# Supplementary material
Source: Royal Society of Chemistry journal article supplement (doi:10.1039/d5em00562k)
Supplement: d5em00562k1.xlsx [file d5em00562k1.xlsx]

## Sheet: Supplementary Materials
Supplementary Materials
Machine learning-based predictive modeling of vascular toxicity for emerging organic pollutants in wastewater
Aubin Siewetcheu Toukak a, Wenjie Gao a, Ning Li a *, Guanyi Chen a,b,c
a School of Environmental Science and Engineering/Tianjin Key Lab of Biomass/Wastes Utilization, Tianjin University, Tianjin 300350, China b School of Mechanical Engineering, Tianjin University of Commerce, Tianjin 300134, China c School of Ecology and Environment, Tibet University, Lhasa 850000, China
* Corresponding author
E-mail: liningec@tju.edu.cn
Table S1. The list of 312 emerging organic pollutants (EOPs) analyzed in the study, including CAS numbers, chemical names, SMILES structures, and chemical classes of all compounds used for model training and prediction.
Table S2. Description of deep learning models based on the 60 ToxCast assays
Table S3. Activity of EOPs for each assay using ToxCast in vitro assays and deep learning models. Binary matrix (active/inactive) displaying both ToxCast experimental results and deep learning model predictions for each compound across the 25 selected assays.

## Sheet: TS1. List of 312 EOPs
Table S1. The list of 312 emerging organic pollutants (EOPs) analyzed in the study, including CAS numbers, chemical names, SMILES structures, and chemical classes of all compounds used for model training and prediction.
Chemical class	CAS N°	Chemical name	dsstox substance id	code	InChIKey	SMILES
Antibiotics	114-07-8	Erythromycin	DTXSID4022991	C114078	ULGZDMOVFRHVEP-RWJQBGPGSA-N	CC[C@@H]1[C@@]([C@@H]([C@H](C(=O)[C@@H](C[C@@]([C@@H]([C@H]([C@@H]([C@H](C(=O)O1)C)O[C@H]2C[C@@]([C@H]([C@@H](O2)C)O)(C)OC)C)O[C@H]3[C@@H]([C@H](C[C@H](O3)C)N(C)C)O)(C)O)C)C)O)(C)O
	122-11-2	Sulfadimethoxine	DTXSID1023607	C122112	ZZORFUFYDOWNEF-UHFFFAOYSA-N	COC1=NC(=NC(=C1)NS(=O)(=O)C2=CC=C(C=C2)N)OC
	1220-83-3	Sulfamonomethoxine	DTXSID8045351	C1220833	WMPXPUYPYQKQCX-UHFFFAOYSA-N	COC1=NC=NC(=C1)NS(=O)(=O)C2=CC=C(C=C2)N
	144-80-9	Sulfacetamide	DTXSID8026060	C144809	SKIVFJLNDNKQPD-UHFFFAOYSA-N	CC(=O)NS(=O)(=O)C1=CC=C(C=C1)N
	21312-10-7	N-Acetyl sulfamethoxazole	DTXSID8049044	C21312107	GXPIUNZCALHVBA-UHFFFAOYSA-N	CC1=CC(=NO1)NS(=O)(=O)C2=CC=C(C=C2)NC(=O)C
	22916-47-8	Miconazole	DTXSID6023319	C22916478	BYBLEWFAAKGYCD-UHFFFAOYSA-N	C1=CC(=C(C=C1Cl)Cl)COC(CN2C=CN=C2)C3=C(C=C(C=C3)Cl)Cl
	26787-78-0	Amoxicillin	DTXSID3037044	C26787780	LSQZJLSUYDQPKJ-NJBDSQKTSA-N	CC1([C@@H](N2[C@H](S1)[C@@H](C2=O)NC(=O)[C@@H](C3=CC=C(C=C3)O)N)C(=O)O)C
	56-75-7	Chloramphenicol	DTXSID7020265	C56757	WIIZWVCIJKGZOK-RKDXNWHRSA-N	C1=CC(=CC=C1[C@H]([C@@H](CO)NC(=O)C(Cl)Cl)O)[N+](=O)[O-]
	57-68-1	Sulfamethazine	DTXSID6021290	C57681	ASWVTGNCAZCNNR-UHFFFAOYSA-N	CC1=CC(=NC(=N1)NS(=O)(=O)C2=CC=C(C=C2)N)C
	59-40-5	Sulfaquinoxaline	DTXSID8042424	C59405	NHZLNPMOSADWGC-UHFFFAOYSA-N	C1=CC=C2C(=C1)N=CC(=N2)NS(=O)(=O)C3=CC=C(C=C3)N
	60-54-8	Tetracycline	DTXSID7023645	C60548	NWXMGUDVXFXRIG-WESIUVDSSA-N	C[C@@]1([C@H]2C[C@H]3[C@@H](C(=O)C(=C([C@]3(C(=O)C2=C(C4=C1C=CC=C4O)O)O)O)C(=O)N)N(C)C)O
	65277-42-1	Ketoconazole	DTXSID7029879	C65277421	XMAYWYJOQHXEEK-OZXSUGGESA-N	CC(=O)N1CCN(CC1)C2=CC=C(C=C2)OC[C@H]3CO[C@](O3)(CN4C=CN=C4)C5=C(C=C(C=C5)Cl)Cl
	68-35-9	Sulfadiazine	DTXSID7044130	C68359	SEEPANYCNGTZFQ-UHFFFAOYSA-N	C1=CN=C(N=C1)NS(=O)(=O)C2=CC=C(C=C2)N
	70458-96-7	Norfloxacin	DTXSID7037680	C70458967	OGJPXUAPXNRGGI-UHFFFAOYSA-N	CCN1C=C(C(=O)C2=CC(=C(C=C21)N3CCNCC3)F)C(=O)O
	72-14-0	Sulfathiazole	DTXSID8026068	C72140	JNMRHUJNCSQMMB-UHFFFAOYSA-N	C1=CC(=CC=C1N)S(=O)(=O)NC2=NC=CS2
	723-46-6	Sulfamethoxazole	DTXSID8026064	C723466	JLKIGFTWXXRPMT-UHFFFAOYSA-N	CC1=CC(=NO1)NS(=O)(=O)C2=CC=C(C=C2)N
	79-57-2	Oxytetracycline	DTXSID1034260	C79572	OWFJMIVZYSDULZ-PXOLEDIWSA-N	C[C@@]1([C@H]2[C@@H]([C@H]3[C@@H](C(=O)C(=C([C@]3(C(=O)C2=C(C4=C1C=CC=C4O)O)O)O)C(=O)N)N(C)C)O)O
	79660-72-3	Fleroxacin	DTXSID1046714	C79660723	XBJBPGROQZJDOJ-UHFFFAOYSA-N	CN1CCN(CC1)C2=C(C=C3C(=C2F)N(C=C(C3=O)C(=O)O)CCF)F
	80214-83-1	Roxithromycin	DTXSID8041117	C80214831	RXZBMPWDPOLZGW-XMRMVWPWSA-N	CC[C@@H]1[C@@]([C@@H]([C@H](/C(=N/OCOCCOC)/[C@@H](C[C@@]([C@@H]([C@H]([C@@H]([C@H](C(=O)O1)C)O[C@H]2C[C@@]([C@H]([C@@H](O2)C)O)(C)OC)C)O[C@H]3[C@@H]([C@H](C[C@H](O3)C)N(C)C)O)(C)O)C)C)O)(C)O
	81103-11-9	Clarithromycin	DTXSID3022829	C81103119	AGOYDEPGAOXOCK-KCBOHYOISA-N	CC[C@@H]1[C@@]([C@@H]([C@H](C(=O)[C@@H](C[C@@]([C@@H]([C@H]([C@@H]([C@H](C(=O)O1)C)O[C@H]2C[C@@]([C@H]([C@@H](O2)C)O)(C)OC)C)O[C@H]3[C@@H]([C@H](C[C@H](O3)C)N(C)C)O)(C)OC)C)C)O)(C)O
	82419-36-1	Ofloxacin	DTXSID3041085	C82419361	GSDSWSVVBLHKDQ-UHFFFAOYSA-N	CC1COC2=C3N1C=C(C(=O)C3=CC(=C2N4CCN(CC4)C)F)C(=O)O
	83905-01-5	Azithromycin	DTXSID8030760	C83905015	MQTOSJVFKKJCRP-BICOPXKESA-N	CC[C@@H]1[C@@]([C@@H]([C@H](N(C[C@@H](C[C@@]([C@@H]([C@H]([C@@H]([C@H](C(=O)O1)C)O[C@H]2C[C@@]([C@H]([C@@H](O2)C)O)(C)OC)C)O[C@H]3[C@@H]([C@H](C[C@H](O3)C)N(C)C)O)(C)O)C)C)C)O)(C)O
	85721-33-1	Ciprofloxacin	DTXSID8022824	C85721331	MYSWGUAQZAJSOK-UHFFFAOYSA-N	C1CC1N2C=C(C(=O)C3=CC(=C(C=C32)N4CCNCC4)F)C(=O)O
	86386-73-4	Fluconazole	DTXSID3020627	C86386734	RFHAOTPXVQNOHP-UHFFFAOYSA-N	C1=CC(=C(C=C1F)F)C(CN2C=NC=N2)(CN3C=NC=N3)O
	93106-60-6	Enrofloxacin	DTXSID1045619	C93106606	SPFYMRJSYKOXGV-UHFFFAOYSA-N	CCN1CCN(CC1)C2=C(C=C3C(=C2)N(C=C(C3=O)C(=O)O)C4CC4)F
	98105-99-8	Sarafloxacin	DTXSID8048494	C98105998	XBHBWNFJWIASRO-UHFFFAOYSA-N	C1CN(CCN1)C2=C(C=C3C(=C2)N(C=C(C3=O)C(=O)O)C4=CC=C(C=C4)F)F
BPs (Bisphenols)	79-94-7	3,3',5,5'-Tetrabromobisphenol A	DTXSID1026081	C79947	VEORPZCZECFIRK-UHFFFAOYSA-N	CC(C)(C1=CC(=C(C(=C1)Br)O)Br)C2=CC(=C(C(=C2)Br)O)Br
	1478-61-1	Bisphenol AF	DTXSID7037717	C1478611	ZFVMWEVVKGLCIJ-UHFFFAOYSA-N	C1=CC(=CC=C1C(C2=CC=C(C=C2)O)(C(F)(F)F)C(F)(F)F)O
	1571-75-1	4,4'-(1-Phenylethylidene)bisphenol	DTXSID5051444	C1571751	VOWWYDCFAISREI-UHFFFAOYSA-N	CC(C1=CC=CC=C1)(C2=CC=C(C=C2)O)C3=CC=C(C=C3)O
	620-92-8	Bis(4-hydroxyphenyl)methane	DTXSID9022445	C620928	PXKLMJQFEQBVLD-UHFFFAOYSA-N	C1=CC(=CC=C1CC2=CC=C(C=C2)O)O
	77-40-7	Bisphenol B	DTXSID4022442	C77407	HTVITOHKHWFJKO-UHFFFAOYSA-N	CCC(C)(C1=CC=C(C=C1)O)C2=CC=C(C=C2)O
	2081-08-05	Bisphenol E	DTXSID3047891	C2081085	HCNHNBLSNVSJTJ-UHFFFAOYSA-N	CC(C1=CC=C(C=C1)O)C2=CC=C(C=C2)O
	80-05-7	Bisphenol A	DTXSID7020182	C80057	IISBACLAFKSPIT-UHFFFAOYSA-N	CC(C)(C1=CC=C(C=C1)O)C2=CC=C(C=C2)O
	80-09-1	4,4'-Sulfonyldiphenol	DTXSID3022409	C80091	VPWNQTHUCYMVMZ-UHFFFAOYSA-N	C1=CC(=CC=C1O)S(=O)(=O)C2=CC=C(C=C2)O
	843-55-0	Bisphenol Z	DTXSID4047963	C843550	SDDLEVPIDBLVHC-UHFFFAOYSA-N	C1CCC(CC1)(C2=CC=C(C=C2)O)C3=CC=C(C=C3)O
EDCs (Endocrine Disrupting Chemicals)	1912-24-9	Atrazine	DTXSID9020112	C1912249	MXWJVTOOROXGIU-UHFFFAOYSA-N	CCNC1=NC(=NC(=N1)Cl)NC(C)C
	434-22-0	Nandrolone	DTXSID7023350	C434220	NPAGDVCDWIYMMC-IZPLOLCNSA-N	C[C@]12CC[C@H]3[C@H]([C@@H]1CC[C@@H]2O)CCC4=CC(=O)CC[C@H]34
	50-02-2	Dexamethasone	DTXSID3020384	C50022	UREBDLICKHMUKA-CXSFZGCWSA-N	C[C@@H]1C[C@H]2[C@@H]3CCC4=CC(=O)C=C[C@@]4([C@]3([C@H](C[C@@]2([C@]1(C(=O)CO)O)C)O)F)C
	83-43-2	Methylprednisolone	DTXSID7023300	C83432	VHRSUDSXCMQTMA-PJHHCJLFSA-N	C[C@H]1C[C@H]2[C@@H]3CC[C@@]([C@]3(C[C@@H]([C@@H]2[C@@]4(C1=CC(=O)C=C4)C)O)C)(C(=O)CO)O
	481-29-8	Epiandrosterone			QGXBDMJGAMFCBF-LUJOEAJASA-N	C[C@]12CC[C@@H](C[C@@H]1CC[C@@H]3[C@@H]2CC[C@]4([C@H]3CCC4=O)C)O
	140-66-9	4-(1,1,3,3-Tetramethylbutyl)phenol	DTXSID9022360	C140669	ISAVYTVYFVQUDY-UHFFFAOYSA-N	CC(C)(C)CC(C)(C)C1=CC=C(C=C1)O
	50-22-6	Corticosterone	DTXSID6022474	C50226	OMFXVFTZEKFJBZ-HJTSIMOOSA-N	C[C@]12CCC(=O)C=C1CC[C@@H]3[C@@H]2[C@H](C[C@]4([C@H]3CC[C@@H]4C(=O)CO)C)O
	50-23-7	Hydrocortisone	DTXSID7020714	C50237	JYGXADMDTFJGBT-VWUMJDOOSA-N	C[C@]12CCC(=O)C=C1CC[C@@H]3[C@@H]2[C@H](C[C@]4([C@H]3CC[C@@]4(C(=O)CO)O)C)O
	50-24-8	Prednisolone	DTXSID9021184	C50248	OIGNJSKKLXVSLS-VWUMJDOOSA-N	C[C@]12C[C@@H]([C@H]3[C@H]([C@@H]1CC[C@@]2(C(=O)CO)O)CCC4=CC(=O)C=C[C@]34C)O
	50-27-1	Estriol	DTXSID9022366	C50271	PROQIPRRNZUXQM-ZXXIGWHRSA-N	C[C@]12CC[C@H]3[C@H]([C@@H]1C[C@H]([C@@H]2O)O)CCC4=C3C=CC(=C4)O
	50-28-2	17beta-Estradiol	DTXSID0020573	C50282	VOXZDWNPVJITMN-ZBRFXRBCSA-N	C[C@]12CC[C@H]3[C@H]([C@@H]1CC[C@@H]2O)CCC4=C3C=CC(=C4)O
	53-03-2	Prednisone	DTXSID4021185	C53032	XOFYZVNMUHMLCC-ZPOLXVRWSA-N	C[C@]12CC(=O)[C@H]3[C@H]([C@@H]1CC[C@@]2(C(=O)CO)O)CCC4=CC(=O)C=C[C@]34C
	53-06-5	Cortisone	DTXSID5022857	C53065	MFYSYFVPBJMHGN-ZPOLXVRWSA-N	C[C@]12CCC(=O)C=C1CC[C@@H]3[C@@H]2C(=O)C[C@]4([C@H]3CC[C@@]4(C(=O)CO)O)C
	53-16-7	Estrone	DTXSID4022367	C53167	DNXHEGUUPJUMQT-CBZIJGRNSA-N	C[C@]12CC[C@H]3[C@H]([C@@H]1CCC2=O)CCC4=C3C=CC(=C4)O
	53-41-8	Androsterone	DTXSID3036525	C53418	QGXBDMJGAMFCBF-HLUDHZFRSA-N	C[C@]12CC[C@H](C[C@@H]1CC[C@@H]3[C@@H]2CC[C@]4([C@H]3CCC4=O)C)O
	57-63-6	17alpha-Ethinylestradiol	DTXSID5020576	C57636	BFPYWIDHMRZLRN-SLHNCBLASA-N	C[C@]12CC[C@H]3[C@H]([C@@H]1CC[C@]2(C#C)O)CCC4=C3C=CC(=C4)O
	57-83-0	Progesterone	DTXSID3022370	C57830	RJKFOVLPORLFTN-LEKSSAKUSA-N	CC(=O)[C@H]1CC[C@@H]2[C@@]1(CC[C@H]3[C@H]2CCC4=CC(=O)CC[C@]34C)C
	57-91-0	17alpha-Estradiol	DTXSID8022377	C57910	VOXZDWNPVJITMN-SFFUCWETSA-N	C[C@]12CC[C@H]3[C@H]([C@@H]1CC[C@H]2O)CCC4=C3C=CC(=C4)O
	58-18-4	17-Methyltestosterone	DTXSID1033664	C58184	GCKMFJBGXUYNAG-HLXURNFRSA-N	C[C@]12CCC(=O)C=C1CC[C@@H]3[C@@H]2CC[C@]4([C@H]3CC[C@]4(C)O)C
	58-22-0	Testosterone	DTXSID8022371	C58220	MUMGGOZAMZWBJJ-DYKIIFRCSA-N	C[C@]12CC[C@H]3[C@H]([C@@H]1CC[C@@H]2O)CCC4=CC(=O)CC[C@]34C
	595-33-5	Megestrol acetate	DTXSID9040683	C595335	RQZAXGRLVPAYTJ-GQFGMJRRSA-N	CC1=C[C@@H]2[C@H](CC[C@]3([C@H]2CC[C@@]3(C(=O)C)OC(=O)C)C)[C@@]4(C1=CC(=O)CC4)C
	63-05-8	4-Androstene-3,17-dione	DTXSID8024523	C63058	AEMFNILZOJDQLW-QAGGRKNESA-N	C[C@]12CCC(=O)C=C1CC[C@@H]3[C@@H]2CC[C@]4([C@H]3CCC4=O)C
	68-22-4	Norethindrone	DTXSID9023380	C68224	VIKNJXKGJWUCNN-XGXHKTLJSA-N	C[C@]12CC[C@H]3[C@H]([C@@H]1CC[C@]2(C#C)O)CCC4=CC(=O)CC[C@H]34
	68-96-2	17alpha-Hydroxyprogesterone	DTXSID6040747	C68962	DBPWSSGDRRHUNT-CEGNMAFCSA-N	CC(=O)[C@]1(CC[C@@H]2[C@@]1(CC[C@H]3[C@H]2CCC4=CC(=O)CC[C@]34C)C)O
	71-58-9	Medroxyprogesterone acetate	DTXSID0025527	C71589	PSGAAPLEWMOORI-PEINSRQWSA-N	C[C@H]1C[C@@H]2[C@H](CC[C@]3([C@H]2CC[C@@]3(C(=O)C)OC(=O)C)C)[C@@]4(C1=CC(=O)CC4)C
	797-63-7	Levonorgestrel	DTXSID3036496	C797637	WWYNJERNGUHSAO-XUDSTZEESA-N	CC[C@]12CC[C@H]3[C@H]([C@@H]1CC[C@]2(C#C)O)CCC4=CC(=O)CC[C@H]34
OPEs (Organophosphate Esters)	107-66-4	Phosphoric acid, dibutyl ester	DTXSID3040728	C107664	JYFHYPJRHGVZDY-UHFFFAOYSA-N	CCCCOP(=O)(O)OCCCC
	115-86-6	Triphenyl phosphate	DTXSID1021952	C115866	XZZNDPSIHUTMOC-UHFFFAOYSA-N	C1=CC=C(C=C1)OP(=O)(OC2=CC=CC=C2)OC3=CC=CC=C3
	115-96-8	Tris(2-chloroethyl) phosphate	DTXSID5021411	C115968	HQUQLFOMPYWACS-UHFFFAOYSA-N	C(CCl)OP(=O)(OCCCl)OCCCl
	126-71-6	Triisobutyl phosphate	DTXSID8040698	C126716	HRKAMJBPFPHCSD-UHFFFAOYSA-N	CC(C)COP(=O)(OCC(C)C)OCC(C)C
	126-73-8	Tributyl phosphate	DTXSID3021986	C126738	STCOOQWBFONSKY-UHFFFAOYSA-N	CCCCOP(=O)(OCCCC)OCCCC
	13674-84-5	Tris(2-chloroisopropyl)phosphate	DTXSID5026259	C13674845	KVMPUXDNESXNOH-UHFFFAOYSA-N	CC(CCl)OP(=O)(OC(C)CCl)OC(C)CCl
	512-56-1	Trimethyl orthophosphate	DTXSID1021403	C512561	WVLBCYQITXONBZ-UHFFFAOYSA-N	COP(=O)(OC)OC
	78-40-0	Triethyl phosphate	DTXSID8026228	C78400	DQWPFSLDHJDLRL-UHFFFAOYSA-N	CCOP(=O)(OCC)OCC
	78-51-3	Tris(2-butoxyethyl) phosphate	DTXSID5021758	C78513	WTLBZVNBAKMVDP-UHFFFAOYSA-N	CCCCOCCOP(=O)(OCCOCCCC)OCCOCCCC
	791-28-6	Triphenylphosphine oxide	DTXSID2022121	C791286	FIQMHBFVRAXMOP-UHFFFAOYSA-N	C1=CC=C(C=C1)P(=O)(C2=CC=CC=C2)C3=CC=CC=C3
	838-85-7	Diphenyl phosphate	DTXSID1048207	C838857	ASMQGLCHMVWBQR-UHFFFAOYSA-N	C1=CC=C(C=C1)OP(=O)(O)OC2=CC=CC=C2
PAHs (Polycyclic Aromatic Hydrocarbons)	120-12-7	Anthracene	DTXSID0023878	C120127	MWPLVEDNUUSJAV-UHFFFAOYSA-N	C1=CC=C2C=C3C=CC=CC3=CC2=C1
	129-00-0	Pyrene	DTXSID3024289	C129000	BBEAQIROQSPTKN-UHFFFAOYSA-N	C1=CC2=C3C(=C1)C=CC4=CC=CC(=C43)C=C2
	205-99-2	Benzo(b)fluoranthene	DTXSID0023907	C205992	FTOVXSOBNPWTSH-UHFFFAOYSA-N	C1=CC=C2C3=C4C(=CC=C3)C5=CC=CC=C5C4=CC2=C1
	206-44-0	Fluoranthene	DTXSID3024104	C206440	GVEPBJHOBDJJJI-UHFFFAOYSA-N	C1=CC=C2C(=C1)C3=CC=CC4=C3C2=CC=C4
	207-08-9	Benzo[k]fluoranthene	DTXSID0023909	C207089	HAXBIWFMXWRORI-UHFFFAOYSA-N	C1=CC=C2C=C3C4=CC=CC5=C4C(=CC=C5)C3=CC2=C1
	208-96-8	Acenaphthylene	DTXSID3023845	C208968	HXGDTGSAIMULJN-UHFFFAOYSA-N	C1=CC2=C3C(=C1)C=CC3=CC=C2
	218-01-9	Chrysene	DTXSID0022432	C218019	WDECIBYCCFPHNR-UHFFFAOYSA-N	C1=CC=C2C(=C1)C=CC3=C2C=CC4=CC=CC=C43
	56-55-3	Benz(a)anthracene	DTXSID5023902	C56553	DXBHBZVCASKNBY-UHFFFAOYSA-N	C1=CC=C2C(=C1)C=CC3=CC4=CC=CC=C4C=C32
	83-32-9	Acenaphthene	DTXSID3021774	C83329	CWRYPZZKDGJXCA-UHFFFAOYSA-N	C1CC2=CC=CC3=C2C1=CC=C3
	85-01-8	Phenanthrene	DTXSID6024254	C85018	YNPNZTXNASCQKK-UHFFFAOYSA-N	C1=CC=C2C(=C1)C=CC3=CC=CC=C32
	86-73-7	Fluorene	DTXSID8024105	C86737	NIHNNTQXNPWCJQ-UHFFFAOYSA-N	C1C2=CC=CC=C2C3=CC=CC=C31
	91-20-3	Naphthalene	DTXSID8020913	C91203	UFWIBTONFRDIAS-UHFFFAOYSA-N	C1=CC=C2C=CC=CC2=C1
PCBs (Polychlorinated Biphenyls)	35065-27-1	2,2',4,4',5,5'-Hexachlorobiphenyl	DTXSID2032180	C35065271	MVWHGTYKUMDIHL-UHFFFAOYSA-N	C1=C(C(=CC(=C1Cl)Cl)Cl)C2=CC(=C(C=C2Cl)Cl)Cl
Pesticides	101-21-3	Chlorpropham	DTXSID7020764	C101213	CWJSHJJYOPWUGX-UHFFFAOYSA-N	CC(C)OC(=O)NC1=CC(=CC=C1)Cl
	101463-69-8	Flufenoxuron	DTXSID1041978	C101463698	RYLHNOVXKPXDIP-UHFFFAOYSA-N	C1=CC(=C(C(=C1)F)C(=O)NC(=O)NC2=C(C=C(C=C2)OC3=C(C=C(C=C3)C(F)(F)F)Cl)F)F
	10605-21-7	Carbendazim	DTXSID4024729	C10605217	TWFZGCMQGLPBSX-UHFFFAOYSA-N	COC(=O)NC1=NC2=CC=CC=C2N1
	107534-96-3	Tebuconazole	DTXSID9032113	C107534963	PXMNMQRDXWABCY-UHFFFAOYSA-N	CC(C)(C)C(CCC1=CC=C(C=C1)Cl)(CN2C=NC=N2)O
	110488-70-5	Dimethomorph	DTXSID7034545	C110488705	QNBTYORWCCMPQP-NBVRZTHBSA-N	COC1=C(C=C(C=C1)/C(=C/C(=O)N2CCOCC2)/C3=CC=C(C=C3)Cl)OC
	1113-02-6	Omethoate	DTXSID4037580	C1113026	PZXOQEXFMJCDPG-UHFFFAOYSA-N	CNC(=O)CSP(=O)(OC)OC
	114369-43-6	4-(4-Chlorophenyl)-2-phenyl-2-(1H-1,2,4-triazol-1-ylmethyl)butyronitrile	DTXSID8032548	C114369436	RQDJADAKIFFEKQ-UHFFFAOYSA-N	C1=CC=C(C=C1)C(CCC2=CC=C(C=C2)Cl)(CN3C=NC=N3)C#N
	115-32-2	Dicofol	DTXSID4020450	C115322	UOAMTSKGCBMZTC-UHFFFAOYSA-N	C1=CC(=CC=C1C(C2=CC=C(C=C2)Cl)(C(Cl)(Cl)Cl)O)Cl
	116-06-3	Aldicarb	DTXSID0039223	C116063	QGLZXHRNAYXIBU-WEVVVXLNSA-N	CC(C)(/C=N/OC(=O)NC)SC
	119446-68-3	Difenoconazole	DTXSID4032372	C119446683	BQYJATMQXGBDHF-UHFFFAOYSA-N	CC1COC(O1)(CN2C=NC=N2)C3=C(C=C(C=C3)OC4=CC=C(C=C4)Cl)Cl
	120068-37-3	Fipronil	DTXSID4034609	C120068373	ZOCSXAVNDGMNBV-UHFFFAOYSA-N	C1=C(C=C(C(=C1Cl)N2C(=C(C(=N2)C#N)S(=O)C(F)(F)F)N)Cl)C(F)(F)F
	121-75-5	Malathion	DTXSID4020791	C121755	JXSJBGJIGXNWCI-UHFFFAOYSA-N	CCOC(=O)CC(C(=O)OCC)SP(=S)(OC)OC
	121552-61-2	Cyprodinil	DTXSID1032359	C121552612	HAORKNGNJCEJBX-UHFFFAOYSA-N	CC1=CC(=NC(=N1)NC2=CC=CC=C2)C3CC3
	122453-73-0	4-Bromo-2-(4-chlorophenyl)-1-(ethoxymethyl)-5-(trifluoromethyl)-1H-pyrrole-3-carbonitrile	DTXSID9032533	C122453730	CWFOCCVIPCEQCK-UHFFFAOYSA-N	CCOCN1C(=C(C(=C1C(F)(F)F)Br)C#N)C2=CC=C(C=C2)Cl
	13071-79-9	Terbufos	DTXSID2022254	C13071799	XLNZEKHULJKQBA-UHFFFAOYSA-N	CCOP(=S)(OCC)SCSC(C)(C)C
	131341-86-1	Fludioxonil	DTXSID2032398	C131341861	MUJOIMFVNIBMKC-UHFFFAOYSA-N	C1=CC(=C2C(=C1)OC(O2)(F)F)C3=CNC=C3C#N
	13171-21-6	Phosphamidon	DTXSID7021156	C13171216	RGCLLPNLLBQHPF-HJWRWDBZSA-N	CCN(CC)C(=O)/C(=C(\C)/OP(=O)(OC)OC)/Cl
	131860-33-8	Azoxystrobin	DTXSID0032520	C131860338	WFDXOXNFNRHQEC-GHRIWEEISA-N	CO/C=C(\C1=CC=CC=C1OC2=NC=NC(=C2)OC3=CC=CC=C3C#N)/C(=O)OC
	13194-48-4	Ethoprop	DTXSID4032611	C13194484	VJYFKVYYMZPMAB-UHFFFAOYSA-N	CCCSP(=O)(OCC)SCCC
	133855-98-8	Epoxiconazole	DTXSID1040372	C133855988	ZMYFCFLJBGAQRS-IAGOWNOFSA-N	C1=CC=C(C(=C1)[C@@H]2[C@@](O2)(CN3C=NC=N3)C4=CC=C(C=C4)F)Cl
	134-62-3	DEET	DTXSID2021995	C134623	MMOXZBCLCQITDF-UHFFFAOYSA-N	CCN(CC)C(=O)C1=CC=CC(=C1)C
	135410-20-7	(1E)-N-[(6-Chloro-3-pyridinyl)methyl]-N'-cyano-N-methylethanimidamide	DTXSID0034300	C135410207	WCXDHFDTOYPNIE-UHFFFAOYSA-N	CC(=NC#N)N(C)CC1=CN=C(C=C1)Cl
	13593-03-8	Quinalphos	DTXSID7024291	C13593038	JYQUHIFYBATCCY-UHFFFAOYSA-N	CCOP(=S)(OCC)OC1=NC2=CC=CC=C2N=C1
	138261-41-3	Imidacloprid	DTXSID5032442	C138261413	YWTYJOPNNQFBPC-UHFFFAOYSA-N	C1CN(/C(=N/[N+](=O)[O-])/N1)CC2=CN=C(C=C2)Cl
	141-66-2	Dicrotophos	DTXSID9023914	C141662	VEENJGZXVHKXNB-VOTSOKGWSA-N	C/C(=C\C(=O)N(C)C)/OP(=O)(OC)OC
	141517-21-7	Trifloxystrobin	DTXSID4032580	C141517217	ONCZDRURRATYFI-TVJDWZFNSA-N	C/C(=N\OCC1=CC=CC=C1/C(=N\OC)/C(=O)OC)/C2=CC(=CC=C2)C(F)(F)F
	148-79-8	Thiabendazole	DTXSID0021337	C148798	WJCNZQLZVWNLKY-UHFFFAOYSA-N	C1=CC=C2C(=C1)NC(=N2)C3=CSC=N3
	14816-18-3	Phoxim	DTXSID8034324	C14816183	ATROHALUCMTWTB-WYMLVPIESA-N	CCOP(=S)(OCC)O/N=C(\C#N)/C1=CC=CC=C1
	153719-23-4	Thiamethoxam	DTXSID2034962	C153719234	NWWZPOKUUAIXIW-DHZHZOJOSA-N	CN\1COCN(/C1=N/[N+](=O)[O-])CC2=CN=C(S2)Cl
	155569-91-8	Emamectin benzoate	DTXSID0034566	C155569918	GCKZANITAMOIAR-XWVCPFKXSA-N	CC[C@H](C)[C@@H]1[C@H](C=C[C@@]2(O1)C[C@@H]3C[C@H](O2)C/C=C(/[C@H]([C@H](/C=C/C=C/4\CO[C@H]5[C@@]4([C@@H](C=C([C@H]5O)C)C(=O)O3)O)C)O[C@H]6C[C@@H]([C@H]([C@@H](O6)C)O[C@H]7C[C@@H]([C@H]([C@@H](O7)C)NC)OC)OC)\C)C.C1=CC=C(C=C1)C(=O)O
	156052-68-5	Zoxamide	DTXSID9032581	C156052685	SOUGWDPPRBKJEX-UHFFFAOYSA-N	CCC(C)(C(=O)CCl)NC(=O)C1=CC(=C(C(=C1)Cl)C)Cl
	1563-66-2	Carbofuran	DTXSID9020249	C1563662	DUEPRVBVGDRKAG-UHFFFAOYSA-N	CC1(CC2=C(O1)C(=CC=C2)OC(=O)NC)C
	1646-87-3	Aldicarb sulfoxide	DTXSID1033161	C1646873	BXPMAGSOWXBZHS-WEVVVXLNSA-N	CC(C)(/C=N/OC(=O)NC)S(=O)C
	1646-88-4	Aldicarb sulfone	DTXSID6023862	C1646884	YRRKLBAKDXSTNC-WEVVVXLNSA-N	CC(C)(/C=N/OC(=O)NC)S(=O)(=O)C
	16752-77-5	Methomyl	DTXSID1022267	C16752775	UHXUZOCRWCRNSJ-UHFFFAOYSA-N	CC(=NOC(=O)NC)SC
	175013-18-0	Pyraclostrobin	DTXSID7032638	C175013180	HZRSNVGNWUDEFX-UHFFFAOYSA-N	COC(=O)N(C1=CC=CC=C1COC2=NN(C=C2)C3=CC=C(C=C3)Cl)OC
	188425-85-6	Boscalid	DTXSID6034392	C188425856	WYEMLYFITZORAB-UHFFFAOYSA-N	C1=CC=C(C(=C1)C2=CC=C(C=C2)Cl)NC(=O)C3=C(N=CC=C3)Cl
	1897-45-6	Chlorothalonil	DTXSID0020319	C1897456	CRQQGFGUEAVUIL-UHFFFAOYSA-N	C(#N)C1=C(C(=C(C(=C1Cl)Cl)Cl)C#N)Cl
	2032-65-7	Methiocarb	DTXSID3032626	C2032657	YFBPRJGDJKVWAH-UHFFFAOYSA-N	CC1=CC(=CC(=C1SC)C)OC(=O)NC
	22224-92-6	Fenamiphos	DTXSID3024102	C22224926	ZCJPOPBZHLUFHF-UHFFFAOYSA-N	CCOP(=O)(NC(C)C)OC1=CC(=C(C=C1)SC)C
	2310-17-0	Phosalone	DTXSID1024259	C2310170	IOUNQDKNJZEDEP-UHFFFAOYSA-N	CCOP(=S)(OCC)SCN1C2=C(C=C(C=C2)Cl)OC1=O
	23103-98-2	Pirimicarb	DTXSID1032569	C23103982	YFGYUFNIOHWBOB-UHFFFAOYSA-N	CC1=C(N=C(N=C1OC(=O)N(C)C)N(C)C)C
	23564-05-8	Thiophanate-methyl	DTXSID1024338	C23564058	QGHREAKMXXNCOA-UHFFFAOYSA-N	COC(=O)NC(=S)NC1=CC=CC=C1NC(=S)NC(=O)OC
	24017-47-8	Triazophos	DTXSID9037612	C24017478	AMFGTOFWMRQMEM-UHFFFAOYSA-N	CCOP(=S)(OCC)OC1=NN(C=N1)C2=CC=CC=C2
	24353-61-5	Isocarbophos	DTXSID7042063	C24353615	YFVOXLJXJBQDEF-UHFFFAOYSA-N	CC(C)OC(=O)C1=CC=CC=C1OP(=S)(N)OC
	2631-40-5	Isoprocarb	DTXSID6042072	C2631405	QBSJMKIUCUGGNG-UHFFFAOYSA-N	CC(C)C1=CC=CC=C1OC(=O)NC
	2921-88-2	Chlorpyrifos	DTXSID4020458	C2921882	SBPBAQFWLVIOKP-UHFFFAOYSA-N	CCOP(=S)(OCC)OC1=NC(=C(C=C1Cl)Cl)Cl
	29232-93-7	Pirimiphos-methyl	DTXSID0024266	C29232937	QHOQHJPRIBSPCY-UHFFFAOYSA-N	CCN(CC)C1=NC(=CC(=N1)OP(=S)(OC)OC)C
	298-00-0	Methyl parathion	DTXSID1020855	C298000	RLBIQVVOMOPOHC-UHFFFAOYSA-N	COP(=S)(OC)OC1=CC=C(C=C1)[N+](=O)[O-]
	298-02-2	Phorate	DTXSID4032459	C298022	BULVZWIRKLYCBC-UHFFFAOYSA-N	CCOP(=S)(OCC)SCSCC
	2597-03-07	Phenthoate	DTXSID6042280	C2597037	XAMUDJHXFNRLCY-UHFFFAOYSA-N	CCOC(=O)C(C1=CC=CC=C1)SP(=S)(OC)OC
	32809-16-8	Procymidone	DTXSID9033923	C32809168	QXJKBPAVAHBARF-UHFFFAOYSA-N	CC12CC1(C(=O)N(C2=O)C3=CC(=CC(=C3)Cl)Cl)C
	333-41-5	Diazinon	DTXSID9020407	C333415	FHIVAFMUCKRCQO-UHFFFAOYSA-N	CCOP(=S)(OCC)OC1=NC(=NC(=C1)C)C(C)C
	35367-38-5	Diflubenzuron	DTXSID1024049	C35367385	QQQYTWIFVNKMRW-UHFFFAOYSA-N	C1=CC(=C(C(=C1)F)C(=O)NC(=O)NC2=CC=C(C=C2)Cl)F
	36734-19-7	Iprodione	DTXSID3024154	C36734197	ONUFESLQCSAYKA-UHFFFAOYSA-N	CC(C)NC(=O)N1CC(=O)N(C1=O)C2=CC(=CC(=C2)Cl)Cl
	3689-24-5	Sulfotep	DTXSID7024328	C3689245	XIUROWKZWPIAIB-UHFFFAOYSA-N	CCOP(=S)(OCC)OP(=S)(OCC)OCC
	39515-41-8	Fenpropathrin	DTXSID0024002	C39515418	XQUXKZZNEFRCAW-UHFFFAOYSA-N	CC1(C(C1(C)C)C(=O)OC(C#N)C2=CC(=CC=C2)OC3=CC=CC=C3)C
	2588-04-07	Phorate sulfone	DTXSID6042282	C2588047	YVPSNUIHHFTTRL-UHFFFAOYSA-N	CCOP(=S)(OCC)SCS(=O)(=O)CC
	40487-42-1	Pendimethalin	DTXSID7024245	C40487421	CHIFOSRWCNZCFN-UHFFFAOYSA-N	CCC(CC)NC1=C(C=C(C(=C1[N+](=O)[O-])C)C)[N+](=O)[O-]
	41198-08-7	Profenofos	DTXSID3032464	C41198087	QYMMJNLHFKGANY-UHFFFAOYSA-N	CCCSP(=O)(OCC)OC1=C(C=C(C=C1)Br)Cl
	42509-80-8	Isazofos	DTXSID7034676	C42509808	XRHGWAGWAHHFLF-UHFFFAOYSA-N	CCOP(=S)(OCC)OC1=NN(C(=N1)Cl)C(C)C
	43121-43-3	Triadimefon	DTXSID3023897	C43121433	WURBVZBTWMNKQT-UHFFFAOYSA-N	CC(C)(C)C(=O)C(N1C=NC=N1)OC2=CC=C(C=C2)Cl
	50-29-3	DDT	DTXSID4020375	C50293	YVGGHNCTFXOJCH-UHFFFAOYSA-N	C1=CC(=CC=C1C(C2=CC=C(C=C2)Cl)C(Cl)(Cl)Cl)Cl
	50471-44-8	Vinclozolin	DTXSID4022361	C50471448	FSCWZHGZWWDELK-UHFFFAOYSA-N	CC1(C(=O)N(C(=O)O1)C2=CC(=CC(=C2)Cl)Cl)C=C
	51218-45-2	Metolachlor	DTXSID4022448	C51218452	WVQBLGZPHOPPFO-UHFFFAOYSA-N	CCC1=CC=CC(=C1N(C(C)COC)C(=O)CCl)C
	52-68-6	Trichlorfon	DTXSID0021389	C52686	NFACJZMKEDPNKN-UHFFFAOYSA-N	COP(=O)(C(C(Cl)(Cl)Cl)O)OC
	52315-07-8	Cypermethrin	DTXSID1023998	C52315078	KAATUXNTWXVJKI-UHFFFAOYSA-N	CC1(C(C1C(=O)OC(C#N)C2=CC(=CC=C2)OC3=CC=CC=C3)C=C(Cl)Cl)C
	52645-53-1	Permethrin	DTXSID8022292	C52645531	RLLPVAHGXHCWKJ-UHFFFAOYSA-N	CC1(C(C1C(=O)OCC2=CC(=CC=C2)OC3=CC=CC=C3)C=C(Cl)Cl)C
	52918-63-5	Deltamethrin	DTXSID8020381	C52918635	OWZREIFADZCYQD-NSHGMRRFSA-N	CC1([C@H]([C@H]1C(=O)O[C@H](C#N)C2=CC(=CC=C2)OC3=CC=CC=C3)C=C(Br)Br)C
	53112-28-0	Pyrimethanil	DTXSID8034877	C53112280	ZLIBICFPKPWGIZ-UHFFFAOYSA-N	CC1=CC(=NC(=N1)NC2=CC=CC=C2)C
	55-38-9	Fenthion	DTXSID8020620	C55389	PNVJTZOFSHSLTO-UHFFFAOYSA-N	CC1=C(C=CC(=C1)OP(=S)(OC)OC)SC
	55179-31-2	Bitertanol	DTXSID2037502	C55179312	VGPIBGGRCVEHQZ-UHFFFAOYSA-N	CC(C)(C)C(C(N1C=NC=N1)OC2=CC=C(C=C2)C3=CC=CC=C3)O
	55219-65-3	Triadimenol	DTXSID0032493	C55219653	BAZVSMNPJJMILC-UHFFFAOYSA-N	CC(C)(C)C(C(N1C=NC=N1)OC2=CC=C(C=C2)Cl)O
	55285-14-8	Carbosulfan	DTXSID5023950	C55285148	JLQUFIHWVLZVTJ-UHFFFAOYSA-N	CCCCN(CCCC)SN(C)C(=O)OC1=CC=CC2=C1OC(C2)(C)C
	5598-13-0	Chlorpyrifos-methyl	DTXSID6032352	C5598130	HRBKVYFZANMGRE-UHFFFAOYSA-N	COP(=S)(OC)OC1=NC(=C(C=C1Cl)Cl)Cl
	56-38-2	Parathion	DTXSID7021100	C56382	LCCNCVORNKJIRZ-UHFFFAOYSA-N	CCOP(=S)(OCC)OC1=CC=C(C=C1)[N+](=O)[O-]
	56-72-4	Coumaphos	DTXSID2020347	C56724	BXNANOICGRISHX-UHFFFAOYSA-N	CCOP(=S)(OCC)OC1=CC2=C(C=C1)C(=C(C(=O)O2)Cl)C
	56070-16-7	Terbufos sulfone	DTXSID1042443	C56070167	DWZSTEUTHNUVQD-UHFFFAOYSA-N	CCOP(=S)(OCC)SCS(=O)(=O)C(C)(C)C
	57837-19-1	Metalaxyl	DTXSID6024175	C57837191	ZQEIXNIJLIKNTD-UHFFFAOYSA-N	CC1=C(C(=CC=C1)C)N(C(C)C(=O)OC)C(=O)COC
	58-89-9	Lindane	DTXSID2020686	C58899	JLYXXMFPNIAWKQ-UHFFFAOYSA-N	C1(C(C(C(C(C1Cl)Cl)Cl)Cl)Cl)Cl
	60-51-5	Dimethoate	DTXSID7020479	C60515	MCWXGJITAZMZEV-UHFFFAOYSA-N	CNC(=O)CSP(=S)(OC)OC
	60168-88-9	Fenarimol	DTXSID2032390	C60168889	NHOWDZOIZKMVAI-UHFFFAOYSA-N	C1=CC=C(C(=C1)C(C2=CC=C(C=C2)Cl)(C3=CN=CN=C3)O)Cl
	60207-90-1	Propiconazole	DTXSID8024280	C60207901	STJLVHWMYQXCPB-UHFFFAOYSA-N	CCCC1COC(O1)(CN2C=NC=N2)C3=C(C=C(C=C3)Cl)Cl
	62-73-7	Dichlorvos	DTXSID5020449	C62737	OEBRKCOSUFCWJD-UHFFFAOYSA-N	COP(=O)(OC)OC=C(Cl)Cl
	63-25-2	Carbaryl	DTXSID9020247	C63252	CVXBEEMKQHEXEN-UHFFFAOYSA-N	CNC(=O)OC1=CC=CC2=CC=CC=C21
	66246-88-6	Penconazole	DTXSID8042260	C66246886	WKBPZYKAUNRMKP-UHFFFAOYSA-N	CCCC(CN1C=NC=N1)C2=C(C=C(C=C2)Cl)Cl
	67747-09-5	Prochloraz	DTXSID4024270	C67747095	TVLSRXXIMLFWEO-UHFFFAOYSA-N	CCCN(CCOC1=C(C=C(C=C1Cl)Cl)Cl)C(=O)N2C=CN=C2
	68085-85-8	alpha-Cyhalothrin	DTXSID6023997	C68085858	ZXQYGBMAQZUVMI-UNOMPAQXSA-N	CC1(C(C1C(=O)OC(C#N)C2=CC(=CC=C2)OC3=CC=CC=C3)/C=C(/C(F)(F)F)\Cl)C
	68157-60-8	Forchlorfenuron	DTXSID1034634	C68157608	GPXLRLUVLMHHIK-UHFFFAOYSA-N	C1=CC=C(C=C1)NC(=O)NC2=CC(=NC=C2)Cl
	68359-37-5	Cyfluthrin	DTXSID5035957	C68359375	QQODLKZGRKWIFG-UHFFFAOYSA-N	CC1(C(C1C(=O)OC(C#N)C2=CC(=C(C=C2)F)OC3=CC=CC=C3)C=C(Cl)Cl)C
	6923-22-4	Monocrotophos	DTXSID9034816	C6923224	KRTSDMXIXPKRQR-AATRIKPKSA-N	C/C(=C\C(=O)NC)/OP(=O)(OC)OC
	69409-94-5	Fluvalinate	DTXSID7024110	C69409945	INISTDXBRIBGOC-UHFFFAOYSA-N	CC(C)C(C(=O)OC(C#N)C1=CC(=CC=C1)OC2=CC=CC=C2)NC3=C(C=C(C=C3)C(F)(F)F)Cl
	70124-77-5	Flucythrinate	DTXSID0022301	C70124775	GBIHOLCMZGAKNG-UHFFFAOYSA-N	CC(C)C(C1=CC=C(C=C1)OC(F)F)C(=O)OC(C#N)C2=CC(=CC=C2)OC3=CC=CC=C3
	71422-67-8	Chlorfluazuron	DTXSID5041772	C71422678	UISUNVFOGSJSKD-UHFFFAOYSA-N	C1=CC(=C(C(=C1)F)C(=O)NC(=O)NC2=CC(=C(C(=C2)Cl)OC3=C(C=C(C=N3)C(F)(F)F)Cl)Cl)F
	71626-11-4	Benalaxyl	DTXSID3041619	C71626114	CJPQIRJHIZUAQP-UHFFFAOYSA-N	CC1=C(C(=CC=C1)C)N(C(C)C(=O)OC)C(=O)CC2=CC=CC=C2
	71751-41-2	Abamectin	DTXSID8023892	C71751412	IBSREHMXUMOFBB-MVGRHBATSA-N	CCC(C)[C@@H]1[C@H](C=C[C@@]2(O1)C[C@@H]3C[C@H](O2)C/C=C(/[C@H]([C@H](/C=C/C=C/4\CO[C@H]5[C@@]4([C@@H](C=C([C@H]5O)C)C(=O)O3)O)C)O[C@H]6C[C@@H]([C@H]([C@@H](O6)C)O[C@H]7C[C@@H]([C@H]([C@@H](O7)C)O)OC)OC)\C)C.C[C@H]1/C=C/C=C/2\CO[C@H]3[C@@]2([C@@H](C=C([C@H]3O)C)C(=O)O[C@H]4C[C@@H](C/C=C(/[C@H]1O[C@H]5C[C@@H]([C@H]([C@@H](O5)C)O[C@H]6C[C@@H]([C@H]([C@@H](O6)C)O)OC)OC)\C)O[C@]7(C4)C=C[C@@H]([C@H](O7…
	72-54-8	p,p'-DDD	DTXSID4020373	C72548	AHJKRLASYNVKDZ-UHFFFAOYSA-N	C1=CC(=CC=C1C(C2=CC=C(C=C2)Cl)C(Cl)Cl)Cl
	72-55-9	p,p'-DDE	DTXSID9020374	C72559	UCNVFOCBFJOQAL-UHFFFAOYSA-N	C1=CC(=CC=C1C(=C(Cl)Cl)C2=CC=C(C=C2)Cl)Cl
	7287-19-6	Prometryn	DTXSID4024272	C7287196	AAEVYOVXGOFMJO-UHFFFAOYSA-N	CC(C)NC1=NC(=NC(=N1)SC)NC(C)C
	732-11-6	Phosmet	DTXSID5024261	C732116	LMNZTLDVJIUSHT-UHFFFAOYSA-N	COP(=S)(OC)SCN1C(=O)C2=CC=CC=C2C1=O
	74115-24-5	Clofentezine	DTXSID9023881	C74115245	UXADOQPNKNTIHB-UHFFFAOYSA-N	C1=CC=C(C(=C1)C2=NN=C(N=N2)C3=CC=CC=C3Cl)Cl
	76738-62-0	Paclobutrazol	DTXSID2024242	C76738620	RMOGWMIKYWRTKW-KGLIPLIRSA-N	CC(C)(C)[C@H]([C@@H](CC1=CC=C(C=C1)Cl)N2C=NC=N2)O
	789-02-6	o,p'-DDT	DTXSID6022345	C789026	CVUGPAFCQJIYDT-UHFFFAOYSA-N	C1=CC=C(C(=C1)C(C2=CC=C(C=C2)Cl)C(Cl)(Cl)Cl)Cl
	79622-59-6	Fluazinam	DTXSID7032551	C79622596	UZCGKGPEKUCDTF-UHFFFAOYSA-N	C1=C(C=NC(=C1Cl)NC2=C(C=C(C(=C2[N+](=O)[O-])Cl)C(F)(F)F)[N+](=O)[O-])C(F)(F)F
	79983-71-4	Hexaconazole	DTXSID4034653	C79983714	STMIIPIFODONDC-UHFFFAOYSA-N	CCCCC(CN1C=NC=N1)(C2=C(C=C(C=C2)Cl)Cl)O
	80844-07-1	Etofenprox	DTXSID9032610	C80844071	YREQHYQNNWYQCJ-UHFFFAOYSA-N	CCOC1=CC=C(C=C1)C(C)(C)COCC2=CC(=CC=C2)OC3=CC=CC=C3
	82-68-8	Pentachloronitrobenzene	DTXSID2021105	C82688	LKPLKUMXSAEKID-UHFFFAOYSA-N	C1(=C(C(=C(C(=C1Cl)Cl)Cl)Cl)Cl)[N+](=O)[O-]
	834-12-8	Ametryn	DTXSID1023869	C834128	RQVYBGPQFYCBGX-UHFFFAOYSA-N	CCNC1=NC(=NC(=N1)SC)NC(C)C
	83657-24-3	Diniconazole	DTXSID2040363	C83657243	FBOUIAKEJMZPQG-AWNIVKPZSA-N	CC(C)(C)C(/C(=C\C1=C(C=C(C=C1)Cl)Cl)/N2C=NC=N2)O
	85509-19-9	Flusilazole	DTXSID3024235	C85509199	FQKUGOMFVDPBIZ-UHFFFAOYSA-N	C[Si](CN1C=NC=N1)(C2=CC=C(C=C2)F)C3=CC=C(C=C3)F
	86-50-0	Azinphos-methyl	DTXSID3020122	C86500	CJJOSEISRRTUQB-UHFFFAOYSA-N	COP(=S)(OC)SCN1C(=O)C2=CC=CC=C2N=N1
	88671-89-0	Myclobutanil	DTXSID8024315	C88671890	HZJKXKUJVSEEFU-UHFFFAOYSA-N	CCCCC(CN1C=NC=N1)(C#N)C2=CC=C(C=C2)Cl
	944-22-9	Fonofos	DTXSID2024113	C944229	KVGLBTYUCJYMND-UHFFFAOYSA-N	CCOP(=S)(CC)SC1=CC=CC=C1
	950-37-8	Methidathion	DTXSID5020819	C950378	MEBQXILRKZHVCX-UHFFFAOYSA-N	COC1=NN(C(=O)S1)CSP(=S)(OC)OC
	96489-71-3	Pyridaben	DTXSID5032573	C96489713	DWFZBUWUXWZWKD-UHFFFAOYSA-N	CC(C)(C)C1=CC=C(C=C1)CSC2=C(C(=O)N(N=C2)C(C)(C)C)Cl
	3766-81-2	Fenobucarb			DIRFUJHNVNOBMY-UHFFFAOYSA-N	CCC(C)C1=CC=CC=C1OC(=O)NC
	16655-82-6	Carbofuran-3-hydroxy			RHSUJRQZTQNSLL-UHFFFAOYSA-N	CC1(C(C2=C(O1)C(=CC=C2)OC(=O)NC)O)C
	95465-99-9	Cadusafos			KXRPCFINVWWFHQ-UHFFFAOYSA-N	CCC(C)SP(=O)(OCC)SC(C)CC
	2588-03-06	Phorate sulfoxide			XRQHTUDGPWMPKX-UHFFFAOYSA-N	CCOP(=S)(OCC)SCS(=O)CC
	50512-35-1	Isoprothiolane			UFHLMYOGRXOCSL-UHFFFAOYSA-N	CC(C)OC(=O)C(=C1SCCS1)C(=O)OC(C)C
	3761-41-9	Fenthion-sulfoxide			DLAPIMGBBDILHJ-UHFFFAOYSA-N	CC1=C(C=CC(=C1)OP(=S)(OC)OC)S(=O)C
	57160-47-1	Chlorbenzuron			YPSCQJTUAKNUNF-UHFFFAOYSA-N	C1=CC=C(C(=C1)C(=O)NC(=O)NC2=CC=C(C=C2)Cl)Cl
	3761-42-0	Fenthion-sulfone			ZDHYERRNXRANLI-UHFFFAOYSA-N	CC1=C(C=CC(=C1)OP(=S)(OC)OC)S(=O)(=O)C
	120068-36-2	Fipronil sulfone			LGHZJDKSVUTELU-UHFFFAOYSA-N	C1=C(C=C(C(=C1Cl)N2C(=C(C(=N2)C#N)S(=O)(=O)C(F)(F)F)N)Cl)C(F)(F)F
	99675-03-3	Isofenphos-methyl			IXTOWLKEARFCCP-UHFFFAOYSA-N	CC(C)NP(=S)(OC)OC1=CC=CC=C1C(=O)OC(C)C
	51630-58-1	Fenvalerate			NYPJDWWKZLNGGM-UHFFFAOYSA-N	CC(C)C(C1=CC=C(C=C1)Cl)C(=O)OC(C#N)C2=CC(=CC=C2)OC3=CC=CC=C3
PFASs	13252-13-6	Perfluoro-2-methyl-3-oxahexanoic acid	DTXSID70880215	C13252136	CSEBNABAWMZWIF-UHFFFAOYSA-N	C(=O)(C(C(F)(F)F)(OC(C(C(F)(F)F)(F)F)(F)F)F)O
	13252-14-7	Perfluoro-2,5-dimethyl-3,6-dioxanonanoic acid	DTXSID00892442	C13252147	OIVQVBDAMYDDEM-UHFFFAOYSA-N	C(=O)(C(C(F)(F)F)(OC(C(C(F)(F)F)(OC(C(C(F)(F)F)(F)F)(F)F)F)(F)F)F)O
	1763-23-1	Perfluorooctanesulfonic acid	DTXSID3031864	C1763231	YFSUTJLHUFNCNZ-UHFFFAOYSA-N	C(C(C(C(C(F)(F)S(=O)(=O)O)(F)F)(F)F)(F)F)(C(C(C(F)(F)F)(F)F)(F)F)(F)F
	2058-94-8	Perfluoroundecanoic acid	DTXSID8047553	C2058948	SIDINRCMMRKXGQ-UHFFFAOYSA-N	C(=O)(C(C(C(C(C(C(C(C(C(C(F)(F)F)(F)F)(F)F)(F)F)(F)F)(F)F)(F)F)(F)F)(F)F)(F)F)O
	2706-90-3	Perfluoropentanoic acid	DTXSID6062599	C2706903	CXZGQIAOTKWCDB-UHFFFAOYSA-N	C(=O)(C(C(C(C(F)(F)F)(F)F)(F)F)(F)F)O
	307-24-4	Perfluorohexanoic acid	DTXSID3031862	C307244	PXUULQAPEKKVAH-UHFFFAOYSA-N	C(=O)(C(C(C(C(C(F)(F)F)(F)F)(F)F)(F)F)(F)F)O
	335-67-1	Perfluorooctanoic acid	DTXSID8031865	C335671	SNGREZUHAYWORS-UHFFFAOYSA-N	C(=O)(C(C(C(C(C(C(C(F)(F)F)(F)F)(F)F)(F)F)(F)F)(F)F)(F)F)O
	335-76-2	Perfluorodecanoic acid	DTXSID3031860	C335762	PCIUEQPBYFRTEM-UHFFFAOYSA-N	C(=O)(C(C(C(C(C(C(C(C(C(F)(F)F)(F)F)(F)F)(F)F)(F)F)(F)F)(F)F)(F)F)(F)F)O
	355-46-4	Perfluorohexanesulfonic acid	DTXSID7040150	C355464	QZHDEAJFRJCDMF-UHFFFAOYSA-N	C(C(C(C(F)(F)S(=O)(=O)O)(F)F)(F)F)(C(C(F)(F)F)(F)F)(F)F
	375-22-4	Perfluorobutanoic acid	DTXSID4059916	C375224	YPJUNDFVDDCYIH-UHFFFAOYSA-N	C(=O)(C(C(C(F)(F)F)(F)F)(F)F)O
	375-73-5	Perfluorobutanesulfonic acid	DTXSID5030030	C375735	JGTNAGYHADQMCM-UHFFFAOYSA-N	C(C(C(F)(F)S(=O)(=O)O)(F)F)(C(F)(F)F)(F)F
	375-85-9	Perfluoroheptanoic acid	DTXSID1037303	C375859	ZWBAMYVPMDSJGQ-UHFFFAOYSA-N	C(=O)(C(C(C(C(C(C(F)(F)F)(F)F)(F)F)(F)F)(F)F)(F)F)O
	375-95-1	Perfluorononanoic acid	DTXSID8031863	C375951	UZUFPBIDKMEQEQ-UHFFFAOYSA-N	C(=O)(C(C(C(C(C(C(C(C(F)(F)F)(F)F)(F)F)(F)F)(F)F)(F)F)(F)F)(F)F)O
	335-77-3	henicosafluorodecanesulphonic acid			HYWZIAVPBSTISZ-UHFFFAOYSA-N	C(C(C(C(C(C(F)(F)S(=O)(=O)O)(F)F)(F)F)(F)F)(F)F)(C(C(C(C(F)(F)F)(F)F)(F)F)(F)F)(F)F
	307-55-1	Perfluorododecanoic acid			CXGONMQFMIYUJR-UHFFFAOYSA-N	C(=O)(C(C(C(C(C(C(C(C(C(C(C(F)(F)F)(F)F)(F)F)(F)F)(F)F)(F)F)(F)F)(F)F)(F)F)(F)F)(F)F)O
Pharmaceuticals	10238-21-8	Glybenclamide	DTXSID0037237	C10238218	ZNNLBTZKUZBEKO-UHFFFAOYSA-N	COC1=C(C=C(C=C1)Cl)C(=O)NCCC2=CC=C(C=C2)S(=O)(=O)NC(=O)NC3CCCCC3
	103-90-2	Acetaminophen	DTXSID2020006	C103902	RZVAJINKPMORJF-UHFFFAOYSA-N	CC(=O)NC1=CC=C(C=C1)O
	125-33-7	Primidone	DTXSID7023510	C125337	DQMZLTXERSFNPB-UHFFFAOYSA-N	CCC1(C(=O)NCNC1=O)C2=CC=CC=C2
	15687-27-1	Ibuprofen	DTXSID5020732	C15687271	HEFNNWSXXWATRW-UHFFFAOYSA-N	CC(C)CC1=CC=C(C=C1)C(C)C(=O)O
	18559-94-9	Salbutamol	DTXSID5021255	C18559949	NDAUXUAQIAJITI-UHFFFAOYSA-N	CC(C)(C)NCC(C1=CC(=C(C=C1)O)CO)O
	22071-15-4	Ketoprofen	DTXSID6020771	C22071154	DKYWVDODHFEZIM-UHFFFAOYSA-N	CC(C1=CC(=CC=C1)C(=O)C2=CC=CC=C2)C(=O)O
	22204-53-1	Naproxen	DTXSID4040686	C22204531	CMWTZPSULFXXJA-VIFPVBQESA-N	C[C@@H](C1=CC2=C(C=C1)C=C(C=C2)OC)C(=O)O
	25812-30-0	Gemfibrozil	DTXSID0020652	C25812300	HEMJJKBWTPKOJG-UHFFFAOYSA-N	CC1=CC(=C(C=C1)C)OCCCC(C)(C)C(=O)O
	29122-68-7	Atenolol	DTXSID2022628	C29122687	METKIMKYRPQLGS-UHFFFAOYSA-N	CC(C)NCC(COC1=CC=C(C=C1)CC(=O)N)O
	298-46-4	Carbamazepine	DTXSID4022731	C298464	FFGPTBGBLSHEPO-UHFFFAOYSA-N	C1=CC=C2C(=C1)C=CC3=CC=CC=C3N2C(=O)N
	3930-20-9	Sotalol	DTXSID0023589	C3930209	ZBMZVLHSJCTVON-UHFFFAOYSA-N	CC(C)NCC(C1=CC=C(C=C1)NS(=O)(=O)C)O
	41859-67-0	Bezafibrate	DTXSID3029869	C41859670	IIBYAHWJQTYFKB-UHFFFAOYSA-N	CC(C)(C(=O)O)OC1=CC=C(C=C1)CCNC(=O)C2=CC=C(C=C2)Cl
	439-14-5	Diazepam	DTXSID4020406	C439145	AAOVKJBEBIDNHE-UHFFFAOYSA-N	CN1C(=O)CN=C(C2=C1C=CC(=C2)Cl)C3=CC=CC=C3
	443-48-1	Metronidazole	DTXSID2020892	C443481	VAOCPAMSLUNLGC-UHFFFAOYSA-N	CC1=NC=C(N1CCO)[N+](=O)[O-]
	50-78-2	Aspirin	DTXSID5020108	C50782	BSYNRYMUTXBXSQ-UHFFFAOYSA-N	CC(=O)OC1=CC=CC=C1C(=O)O
	51384-51-1	Metoprolol	DTXSID2023309	C51384511	IUBSYMUCCVWXPE-UHFFFAOYSA-N	CC(C)NCC(COC1=CC=C(C=C1)CCOC)O
	54910-89-3	Fluoxetine	DTXSID7023067	C54910893	RTHCYVBBDHJXIQ-UHFFFAOYSA-N	CNCCC(C1=CC=CC=C1)OC2=CC=C(C=C2)C(F)(F)F
	58-08-2	Caffeine	DTXSID0020232	C58082	RYYVLZVUVIJVGH-UHFFFAOYSA-N	CN1C=NC2=C1C(=O)N(C(=O)N2C)C
	58-73-1	Diphenhydramine	DTXSID4022949	C58731	ZZVUWRFHKOJYTH-UHFFFAOYSA-N	CN(C)CCOC(C1=CC=CC=C1)C2=CC=CC=C2
	60-80-0	Phenazone	DTXSID6021117	C60800	VEQOALNAAJBPNY-UHFFFAOYSA-N	CC1=CC(=O)N(N1C)C2=CC=CC=C2
	76-57-3	Codeine	DTXSID2020341	C76573	OROGSEYTTFOCAN-DNJOTXNNSA-N	CN1CC[C@]23[C@@H]4[C@H]1CC5=C2C(=C(C=C5)OC)O[C@H]3[C@H](C=C4)O
	882-09-7	Clofibric acid	DTXSID1040661	C882097	TXCGAZHTZHNUAI-UHFFFAOYSA-N	CC(C)(C(=O)O)OC1=CC=C(C=C1)Cl
	94-13-3	Propylparaben	DTXSID4022527	C94133	QELSKZZBTMNZEB-UHFFFAOYSA-N	CCCOC(=O)C1=CC=C(C=C1)O
	99-76-3	Methylparaben	DTXSID4022529	C99763	LXCFILQKKLGQFO-UHFFFAOYSA-N	COC(=O)C1=CC=C(C=C1)O
Plasticizers (PAEs)	117-81-7	Di(2-ethylhexyl) phthalate	DTXSID5020607	C117817	BJQHLKABXJIVAM-UHFFFAOYSA-N	CCCCC(CC)COC(=O)C1=CC=CC=C1C(=O)OCC(CC)CCCC
	117-82-8	Di(2-methoxyethyl) phthalate	DTXSID8025094	C117828	HSUIVCLOAAJSRE-UHFFFAOYSA-N	COCCOC(=O)C1=CC=CC=C1C(=O)OCCOC
	117-83-9	Bis(2-butoxyethyl) phthalate	DTXSID9047174	C117839	CMCJNODIWQEOAI-UHFFFAOYSA-N	CCCCOCCOC(=O)C1=CC=CC=C1C(=O)OCCOCCCC
	117-84-0	Di-n-octyl phthalate	DTXSID1021956	C117840	MQIUGAXCHLFZKX-UHFFFAOYSA-N	CCCCCCCCOC(=O)C1=CC=CC=C1C(=O)OCCCCCCCC
	131-11-3	Dimethyl phthalate	DTXSID3022455	C131113	NIQCNGHVCWTJSM-UHFFFAOYSA-N	COC(=O)C1=CC=CC=C1C(=O)OC
	84-61-7	Dicyclohexyl phthalate	DTXSID5025021	C84617	VOWAEIGWURALJQ-UHFFFAOYSA-N	C1CCC(CC1)OC(=O)C2=CC=CC=C2C(=O)OC3CCCCC3
	84-66-2	Diethyl phthalate	DTXSID7021780	C84662	FLKPEMZONWLCSK-UHFFFAOYSA-N	CCOC(=O)C1=CC=CC=C1C(=O)OCC
	84-69-5	Diisobutyl phthalate	DTXSID9022522	C84695	MGWAVDBGNNKXQV-UHFFFAOYSA-N	CC(C)COC(=O)C1=CC=CC=C1C(=O)OCC(C)C
	84-74-2	Dibutyl 1,2-benzenedicarboxylate	DTXSID2021781	C84742	DOIRQSBPFJWKBE-UHFFFAOYSA-N	CCCCOC(=O)C1=CC=CC=C1C(=O)OCCCC
	85-68-7	Benzyl butyl phthalate	DTXSID3020205	C85687	IRIAEXORFWYRCZ-UHFFFAOYSA-N	CCCCOC(=O)C1=CC=CC=C1C(=O)OCC2=CC=CC=C2
	84-75-3	Dihexyl phthalate	DTXSID6025068	C84753	KCXZNSGUUQJJTR-UHFFFAOYSA-N	CCCCCCOC(=O)C1=CC=CC=C1C(=O)OCCCCCC
	605-54-9	Bis(2-ethoxyethyl) phthalate			RMKYMNRQXYPJHL-UHFFFAOYSA-N	CCOCCOC(=O)C1=CC=CC=C1C(=O)OCCOCC
PPCPs	127-79-7	Sulfamerazine	DTXSID0023612	C127797	QPPBRPIAZZHUNT-UHFFFAOYSA-N	CC1=NC(=NC=C1)NS(=O)(=O)C2=CC=C(C=C2)N
	144-82-1	Sulfamethizole	DTXSID5023615	C144821	VACCAVUAMIDAGB-UHFFFAOYSA-N	CC1=NN=C(S1)NS(=O)(=O)C2=CC=C(C=C2)N
	144-83-2	Sulfapyridine	DTXSID3026067	C144832	GECHUMIMRBOMGK-UHFFFAOYSA-N	C1=CC=NC(=C1)NS(=O)(=O)C2=CC=C(C=C2)N
	14698-29-4	Oxolinic acid	DTXSID1021089	C14698294	KYGZCKSPAKDVKC-UHFFFAOYSA-N	CCN1C=C(C(=O)C2=CC3=C(C=C21)OCO3)C(=O)O
	15307-86-5	Diclofenac	DTXSID6022923	C15307865	DCOPUUMXTXDBNB-UHFFFAOYSA-N	C1=CC=C(C(=C1)CC(=O)O)NC2=C(C=CC=C2Cl)Cl
	15318-45-3	Thiamphenicol	DTXSID5021338	C15318453	OTVAEFIXJLOWRX-NXEZZACHSA-N	CS(=O)(=O)C1=CC=C(C=C1)[C@H]([C@@H](CO)NC(=O)C(Cl)Cl)O
	15676-16-1	Sulpiride	DTXSID1042574	C15676161	BGRJTUBHPOOWDU-UHFFFAOYSA-N	CCN1CCCC1CNC(=O)C2=C(C=CC(=C2)S(=O)(=O)N)OC
	23210-56-2	Ifenprodil	DTXSID2045656	C23210562	UYNVMODNBIQBMV-UHFFFAOYSA-N	CC(C(C1=CC=C(C=C1)O)O)N2CCC(CC2)CC3=CC=CC=C3
	2447-57-6	Sulfadoxine	DTXSID6023608	C2447576	PJSFRIWCGOHTNF-UHFFFAOYSA-N	COC1=C(N=CN=C1OC)NS(=O)(=O)C2=CC=C(C=C2)N
	28657-80-9	Cinoxacin	DTXSID8022822	C28657809	VDUWPHTZYNWKRN-UHFFFAOYSA-N	CCN1C2=CC3=C(C=C2C(=O)C(=N1)C(=O)O)OCO3
	28797-61-7	Pirenzepine	DTXSID7023487	C28797617	RMHMFHUVIITRHF-UHFFFAOYSA-N	CN1CCN(CC1)CC(=O)N2C3=CC=CC=C3C(=O)NC4=C2N=CC=C4
	42835-25-6	Flumequine	DTXSID5045623	C42835256	DPSPPJIUMHPXMA-UHFFFAOYSA-N	CC1CCC2=C3N1C=C(C(=O)C3=CC(=C2)F)C(=O)O
	483-63-6	Crotamiton	DTXSID6040664	C483636	DNTGGZPQPQTDQF-XBXARRHUSA-N	CCN(C1=CC=CC=C1C)C(=O)/C=C/C
	526-08-9	Sulfaphenazole	DTXSID2044131	C526089	QWCJHSGMANYXCW-UHFFFAOYSA-N	C1=CC=C(C=C1)N2C(=CC=N2)NS(=O)(=O)C3=CC=C(C=C3)N
	53-86-1	Indomethacin	DTXSID9020740	C53861	CGIGDMFJXJATDK-UHFFFAOYSA-N	CC1=C(C2=C(N1C(=O)C3=CC=C(C=C3)Cl)C=CC(=C2)OC)CC(=O)O
	58-55-9	Theophylline	DTXSID5021336	C58559	ZFXYFBGIUFBOJW-UHFFFAOYSA-N	CN1C2=C(C(=O)N(C1=O)C)NC=N2
	651-06-9	Sulfameter	DTXSID5023613	C651069	GPTONYMQFTZPKC-UHFFFAOYSA-N	COC1=CN=C(N=C1)NS(=O)(=O)C2=CC=C(C=C2)N
	69-72-7	Salicylic acid	DTXSID7026368	C69727	YGSDEFSMJLZEOE-UHFFFAOYSA-N	C1=CC=C(C(=C1)C(=O)O)O
	69-81-8	Carbazochrome	DTXSID3048310	C69818	SSCSSDNTQJGTJT-UHFFFAOYSA-N	CN1CC(C2=CC(=C(C=C21)O)N=NC(=O)N)O
	738-70-5	Trimethoprim	DTXSID3023712	C738705	IEDVJHCEMCRBQM-UHFFFAOYSA-N	COC1=CC(=CC(=C1OC)OC)CC2=CN=C(N=C2N)N
	80-32-0	Sulfachloropyridazine	DTXSID9045265	C80320	XOXHILFPRYWFOD-UHFFFAOYSA-N	C1=CC(=CC=C1N)S(=O)(=O)NC2=NN=C(C=C2)Cl
	3737-09-05	Disopyramide	DTXSID1045536	C3737095	UVTNFZQICZKOEM-UHFFFAOYSA-N	CC(C)N(CCC(C1=CC=CC=C1)(C2=CC=CC=N2)C(=O)N)C(C)C
	155-91-9	Sulfadimethoxypyrimidine			RMSFTZDTJHYIFE-UHFFFAOYSA-N	COC1=CC(=NC(=N1)NS(=O)(=O)C2=CC=C(C=C2)N)OC
	98079-51-7	Lomefloxacin			ZEKZLJVOYLTDKK-UHFFFAOYSA-N	CCN1C=C(C(=O)C2=CC(=C(C(=C21)F)N3CCNC(C3)C)F)C(=O)O
	61-33-6	Penicillin G			JGSARLDLIJGVTE-MBNYWOFBSA-N	CC1([C@@H](N2[C@H](S1)[C@@H](C2=O)NC(=O)CC3=CC=CC=C3)C(=O)O)C
	87-08-1	Penicillin V			BPLBGHOLXOTWMN-MBNYWOFBSA-N	CC1([C@@H](N2[C@H](S1)[C@@H](C2=O)NC(=O)COC3=CC=CC=C3)C(=O)O)C
	66-79-5	Oxacillin			UWYHMGVUTGAWSP-JKIFEVAISA-N	CC1=C(C(=NO1)C2=CC=CC=C2)C(=O)N[C@H]3[C@@H]4N(C3=O)[C@H](C(S4)(C)C)C(=O)O
	147-52-4	Nafcillin			GPXLMGHLHQJAGZ-JTDSTZFVSA-N	CCOC1=C(C2=CC=CC=C2C=C1)C(=O)N[C@H]3[C@@H]4N(C3=O)[C@H](C(S4)(C)C)C(=O)O
	61-72-3	Cloxacillin			LQOLIRLGBULYKD-JKIFEVAISA-N	CC1=C(C(=NO1)C2=CC=CC=C2Cl)C(=O)N[C@H]3[C@@H]4N(C3=O)[C@H](C(S4)(C)C)C(=O)O
	154-21-2	Lincomycin			OJMMVQQUTAEWLP-KIDUDLJLSA-N	CCC[C@@H]1C[C@H](N(C1)C)C(=O)N[C@@H]([C@@H]2[C@@H]([C@@H]([C@H]([C@H](O2)SC)O)O)O)[C@@H](C)O
	1196-57-2	2-hydroxyquinoxaline			FFRYUAVNPBUEIC-UHFFFAOYSA-N	C1=CC=C2C(=C1)NC(=O)C=N2
	98106-17-3	Difloxacin			NOCJXYPHIIZEHN-UHFFFAOYSA-N	CN1CCN(CC1)C2=C(C=C3C(=C2)N(C=C(C3=O)C(=O)O)C4=CC=C(C=C4)F)F
	22832-87-7	Miconazole Nitrate			MCCACAIVAXEFAL-UHFFFAOYSA-N	C1=CC(=C(C=C1Cl)Cl)COC(CN2C=CN=C2)C3=C(C=C(C=C3)Cl)Cl.[N+](=O)(O)[O-]
	564-25-0	Doxycycline			SGKRLCUYIXIAHR-AKNGSSGZSA-N	C[C@@H]1[C@H]2[C@@H]([C@H]3[C@@H](C(=O)C(=C([C@]3(C(=O)C2=C(C4=C1C=CC=C4O)O)O)O)C(=O)N)N(C)C)O
	57-62-5	Chlortetracycline			DHPRQBPJLMKORJ-XRNKAMNCSA-N	C[C@@]1([C@H]2C[C@H]3[C@@H](C(=O)C(=C([C@]3(C(=O)C2=C(C4=C(C=CC(=C41)Cl)O)O)O)O)C(=O)N)N(C)C)O
	525-66-6	Propranolol			AQHHHDLHHXJYJD-UHFFFAOYSA-N	CC(C)NCC(COC1=CC=CC2=CC=CC=C21)O
	83891-03-6	Norfluoxetine			WIQRCHMSJFFONW-UHFFFAOYSA-N	C1=CC=C(C=C1)C(CCN)OC2=CC=C(C=C2)C(F)(F)F
	79617-96-2	Sertraline			VGKDLMBJGBXTGI-SJCJKPOMSA-N	CN[C@H]1CC[C@H](C2=CC=CC=C12)C3=CC(=C(C=C3)Cl)Cl
	101-20-2	Triclocarban	DTXSID4026214	C101202	ICUTUKXCWQYESQ-UHFFFAOYSA-N	C1=CC(=CC=C1NC(=O)NC2=CC(=C(C=C2)Cl)Cl)Cl
	3380-34-5	Triclosan	DTXSID5032498	C3380345	XEFQLINVKFYRCS-UHFFFAOYSA-N	C1=CC(=C(C=C1Cl)O)OC2=C(C=C(C=C2)Cl)Cl
UV-Filters	118-56-9	3,3,5-Trimethylcyclohexyl salicylate	DTXSID1026241	C118569	WSSJONWNBBTCMG-UHFFFAOYSA-N	CC1CC(CC(C1)(C)C)OC(=O)C2=CC=CC=C2O
	118-60-5	2-Ethylhexyl salicylate	DTXSID7040734	C118605	FMRHJJZUHUTGKE-UHFFFAOYSA-N	CCCCC(CC)COC(=O)C1=CC=CC=C1O
	119-61-9	Benzophenone	DTXSID0021961	C119619	RWCCWEUUXYIKHB-UHFFFAOYSA-N	C1=CC=C(C=C1)C(=O)C2=CC=CC=C2
	131-56-6	2,4-Dihydroxybenzophenone	DTXSID8022406	C131566	ZXDDPOHVAMWLBH-UHFFFAOYSA-N	C1=CC=C(C=C1)C(=O)C2=C(C=C(C=C2)O)O
	131-57-7	2-Hydroxy-4-methoxybenzophenone	DTXSID3022405	C131577	DXGLGDHPHMLXJC-UHFFFAOYSA-N	COC1=CC(=C(C=C1)C(=O)C2=CC=CC=C2)O
	150-13-0	4-Aminobenzoic acid	DTXSID6024466	C150130	ALYNCZNDIQEVRV-UHFFFAOYSA-N	C1=CC(=CC=C1C(=O)O)N
	21245-02-3	2-Ethylhexyl 4-(dimethylamino)benzoate	DTXSID7029320	C21245023	WYWZRNAHINYAEF-UHFFFAOYSA-N	CCCCC(CC)COC(=O)C1=CC=C(C=C1)N(C)C
	5466-77-3	Octinoxate	DTXSID1025302	C5466773	YBGZDTIWKVFICR-JLHYYAGUSA-N	CCCCC(CC)COC(=O)/C=C/C1=CC=C(C=C1)OC
	6197-30-4	2-Ethylhexyl-2-cyano-3,3-diphenylacrylate	DTXSID9025299	C6197304	FMJSMJQBSVNSBF-UHFFFAOYSA-N	CCCCC(CC)COC(=O)C(=C(C1=CC=CC=C1)C2=CC=CC=C2)C#N
	94-09-7	Benzocaine	DTXSID8021804	C94097	BLFLLBZGZJTVJG-UHFFFAOYSA-N	CCOC(=O)C1=CC=C(C=C1)N

## Sheet: TS2. Deep learning models
Table S2. Description of deep learning models based on the 60 ToxCast assays
Assay	Samples	Positives	Negatives	Accuracy ± SD	F1 Score ± SD	ROC AUC ± SD
TOX21_CASP3_HEPG2	6803	287	6516	0.95 ± 0.00	0.31 ± 0.05	0.76 ± 0.04
LTEA_HepaRG_CASP3	956	71	885	0.90 ± 0.01	0.14 ± 0.05	0.53 ± 0.08
LTEA_HepaRG_CASP8	956	77	879	0.90 ± 0.02	0.11 ± 0.08	0.57 ± 0.12
BSK_CASM3C_IL8	1548	145	1403	0.90 ± 0.01	0.32 ± 0.07	0.72 ± 0.04
CCTE_Simmons_MITO_inhib_resp_rate	237	27	210	0.88 ± 0.03	0.25 ± 0.24	0.71 ± 0.25
APR_HepG2_MitoMembPot_72hr	946	106	840	0.85 ± 0.02	0.09 ± 0.04	0.53 ± 0.09
BSK_4H_VEGFRII	1548	194	1354	0.84 ± 0.02	0.26 ± 0.06	0.56 ± 0.04
BSK_KF3CT_IL8	210	28	182	0.76 ± 0.06	0.27 ± 0.12	0.56 ± 0.07
APR_HepG2_MitoMass_24hr	959	119	840	0.84 ± 0.02	0.14 ± 0.04	0.55 ± 0.06
LTEA_HepaRG_MMP3	956	121	835	0.85 ± 0.02	0.20 ± 0.11	0.60 ± 0.07
LTEA_HepaRG_MMP10	956	121	835	0.87 ± 0.02	0.29 ± 0.11	0.71 ± 0.05
BSK_hDFCGF_IL8	1548	201	1347	0.86 ± 0.02	0.35 ± 0.06	0.70 ± 0.02
APR_HepG2_MitoMass_72hr	946	116	830	0.83 ± 0.02	0.16 ± 0.08	0.59 ± 0.06
BSK_CASM3C_IL6	1548	209	1339	0.85 ± 0.01	0.26 ± 0.04	0.63 ± 0.06
LTEA_HepaRG_IL6R	956	134	822	0.83 ± 0.01	0.19 ± 0.06	0.62 ± 0.05
BSK_MyoF_IL8	539	78	461	0.76 ± 0.07	0.21 ± 0.10	0.59 ± 0.08
LTEA_HepaRG_TP53	956	145	811	0.83 ± 0.01	0.25 ± 0.08	0.58 ± 0.1
APR_HepG2_MitoMembPot_24hr	959	160	799	0.78 ± 0.03	0.20 ± 0.07	0.59 ± 0.09
LTEA_HepaRG_IL6	956	154	802	0.82 ± 0.01	0.30 ± 0.08	0.72 ± 0.06
LTEA_HepaRG_NFE2L2	956	163	793	0.80 ± 0.04	0.26 ± 0.06	0.6 ± 0.04
BSK_BE3C_IL1a	1548	269	1279	0.81 ± 0.02	0.35 ± 0.05	0.66 ± 0.02
BSK_IMphg_VCAM1	152	29	123	0.69 ± 0.05	0.28 ± 0.17	0.58 ± 0.18
NVS_ENZ_hFGFR1	147	20	127	0.86 ± 0.06	0.23 ± 0.37	0.69 ± 0.17
TOX21_MMP_ratio	7163	1302	5861	0.84 ± 0.01	0.54 ± 0.01	0.8 ± 0.02
BSK_KF3CT_IL1a	1548	292	1256	0.79 ± 0.01	0.32 ± 0.07	0.65 ± 0.04
CCTE_Mundy_HCI_hNP1_Casp3_7	185	33	152	0.82 ± 0.04	0.29 ± 0.25	0.65 ± 0.15
BSK_BE3C_IL8	210	41	169	0.71 ± 0.05	0.41 ± 0.09	0.61 ± 0.09
BSK_BE3C_MMP1	1548	296	1252	0.77 ± 0.02	0.31 ± 0.03	0.62 ± 0.01
TOX21_ARE_BLA_Agonist_ratio	6497	1229	5268	0.79 ± 0.01	0.40 ± 0.02	0.72 ± 0.03
BSK_LPS_Eselectin	1548	305	1243	0.77 ± 0.02	0.32 ± 0.04	0.65 ± 0.04
BSK_CASM3C_VCAM1	1548	307	1241	0.77 ± 0.02	0.29 ± 0.06	0.63 ± 0.04
BSK_LPS_IL1a	1548	314	1234	0.76 ± 0.03	0.32 ± 0.06	0.64 ± 0.05
BSK_MyoF_MMP1	539	105	434	0.74 ± 0.03	0.23 ± 0.12	0.60 ± 0.05
BSK_IMphg_ESelectin	152	31	121	0.67 ± 0.09	0.31 ± 0.12	0.63 ± 0.11
BSK_hDFCGF_MMP1	1548	321	1227	0.76 ± 0.02	0.33 ± 0.02	0.62 ± 0.04
BSK_LPS_IL8	1548	341	1207	0.73 ± 0.02	0.31 ± 0.07	0.61 ± 0.05
BSK_3C_IL8	1548	347	1201	0.76 ± 0.02	0.38 ± 0.08	0.69 ± 0.04
BSK_BT_xIL17A	539	118	421	0.73 ± 0.03	0.36 ± 0.04	0.62 ± 0.05
BSK_BE3C_MMP9	210	46	164	0.71 ± 0.04	0.40 ± 0.08	0.68 ± 0.06
BSK_3C_VCAM1	1548	342	1206	0.76 ± 0.03	0.37 ± 0.05	0.66 ± 0.02
BSK_IMphg_IL8	152	34	118	0.70 ± 0.09	0.35 ± 0.15	0.65 ± 0.09
BSK_SAg_IL8	1548	356	1192	0.75 ± 0.04	0.38 ± 0.06	0.66 ± 0.03
BSK_3C_Eselectin	1548	372	1176	0.73 ± 0.02	0.34 ± 0.04	0.64 ± 0.02
BSK_BT_xIL6	539	137	402	0.71 ± 0.02	0.40 ± 0.06	0.64 ± 0.06
BSK_KF3CT_MMP9	1548	386	1162	0.73 ± 0.02	0.38 ± 0.04	0.66 ± 0.02
BSK_BT_xIL2	539	138	401	0.68 ± 0.03	0.32 ± 0.11	0.62 ± 0.04
BSK_4H_VCAM1	1548	407	1141	0.75 ± 0.03	0.46 ± 0.05	0.69 ± 0.03
BSK_hDFCGF_VCAM1	1548	414	1134	0.72 ± 0.03	0.41 ± 0.07	0.69 ± 0.04
BSK_LPS_VCAM1	1548	412	1136	0.73 ± 0.02	0.42 ± 0.05	0.68 ± 0.04
BSK_MyoF_VCAM1	539	151	388	0.71 ± 0.07	0.41 ± 0.15	0.64 ± 0.07
BSK_IMphg_IL10	152	43	109	0.62 ± 0.07	0.46 ± 0.08	0.60 ± 0.08
BSK_SAg_Eselectin	1548	445	1103	0.70 ± 0.02	0.43 ± 0.03	0.67 ± 0.01
BSK_BT_xIL17F	539	160	379	0.71 ± 0.05	0.46 ± 0.1	0.69 ± 0.05
NVS_ENZ_hMMP3	95	27	68	0.78 ± 0.17	0.70 ± 0.2	0.83 ± 0.12
ATG_NRF2_ARE_CIS	3394	1130	2264	0.72 ± 0.02	0.56 ± 0.03	0.72 ± 0.02
NVS_ENZ_hMMP1	93	37	56	0.52 ± 0.15	0.35 ± 0.19	0.50 ± 0.10
CCTE_Simmons_MITO_max_resp_rate	237	128	109	0.51 ± 0.09	0.49 ± 0.21	0.56 ± 0.05
NVS_ENZ_hCASP5	107	58	49	0.54 ± 0.06	0.56 ± 0.09	0.58 ± 0.09
NVS_ENZ_hMMP9	193	113	80	0.61 ± 0.07	0.69 ± 0.05	0.62 ± 0.12
CCTE_Simmons_MITO_basal_resp_rate	237	156	81	0.60 ± 0.10	0.69 ± 0.12	0.57 ± 0.08

## Sheet: TS3. Activity analysis
Table S3. Activity of EOPs for each assay using ToxCast in vitro assays and deep learning models.
Samples	Chemical class	casn	Chemical name	ATG_NRF2_ARE_CIS	97	TOX21_ARE_BLA_Agonist_ratio	1110	TOX21_CASP3_HEPG2	2366	TOX21_MMP_ratio	1854	BSK_4H_VCAM1	182	BSK_hDFCGF_VCAM1	258	BSK_LPS_VCAM1	298	BSK_3C_IL8	152	BSK_CASM3C_IL8	212	BSK_hDFCGF_IL8	240	BSK_BT_xIL17F	2817	LTEA_HepaRG_IL6	1044	BSK_SAg_Eselectin	306	BSK_BE3C_MMP9	2889	Results
				ToxCast	Prediction	ToxCast	Prediction	ToxCast	Prediction	ToxCast	Prediction	ToxCast	Prediction	ToxCast	Prediction	ToxCast	Prediction	ToxCast	Prediction	ToxCast	Prediction	ToxCast	Prediction	ToxCast	Prediction	ToxCast	Prediction	ToxCast	Prediction	ToxCast	Prediction	Tox total	Tox active	DL total	DL active	Total active	Tox act/Total	DL act/Total
1	Antibiotics	Erythromycin	CC[C@@H]1[C@@]([C@@H]([C@H](C(=O)[C@@H](C[C@@]([C@@H]([C@H]([C@@H]([C@H](C(=O)O1)C)O[C@H]2C[C@@]([C@H]([C@@H](O2)C)O)(C)OC)C)O[C@H]3[C@@H]([C@H](C[C@H](O3)C)N(C)C)O)(C)O)C)C)O)(C)O	0		0		0		0		0		0		0		0		0		0			0	0		0			1	12	0	2	1	1	0/12	1/2
2	Antibiotics	Sulfadimethoxine	COC1=NC(=NC(=C1)NS(=O)(=O)C2=CC=C(C=C2)N)OC		0	0		0		0			0		0		0		0		0		0		0		0		0		0	3	0	11	0	0	0/3	0/11
3	Antibiotics	Sulfamonomethoxine	COC1=NC=NC(=C1)NS(=O)(=O)C2=CC=C(C=C2)N		0	0		0		0			0		0		0		0		0		0		0		0		0		1	3	0	11	1	1	0/3	1/11
4	Antibiotics	Sulfacetamide	CC(=O)NS(=O)(=O)C1=CC=C(C=C1)N	0		0		0		0			0		0		0		0		0		0		0		0		0		1	4	0	10	1	1	0/4	1/10
5	Antibiotics	N-Acetyl sulfamethoxazole	CC1=CC(=NO1)NS(=O)(=O)C2=CC=C(C=C2)NC(=O)C		0	0		0		0			0		0		0		0		0		0		0		0		0		1	3	0	11	1	1	0/3	1/11
6	Antibiotics	Miconazole	C1=CC(=C(C=C1Cl)Cl)COC(CN2C=CN=C2)C3=C(C=C(C=C3)Cl)Cl		1		1		0	0			1		1		1		0		0		1		0		1		1		1	1	0	13	9	9	0/1	9/13
7	Antibiotics	Amoxicillin	CC1([C@@H](N2[C@H](S1)[C@@H](C2=O)NC(=O)[C@@H](C3=CC=C(C=C3)O)N)C(=O)O)C		1		0		0	0			1		1		0		0		0		0		0		1		1		1	1	0	13	6	6	0/1	6/13
8	Antibiotics	Chloramphenicol	C1=CC(=CC=C1[C@H]([C@@H](CO)NC(=O)C(Cl)Cl)O)[N+](=O)[O-]	0		0		0		0			0		0		0		0		0		0		0		0		0		1	4	0	10	1	1	0/4	1/10
9	Antibiotics	Sulfamethazine	CC1=CC(=NC(=N1)NS(=O)(=O)C2=CC=C(C=C2)N)C	0		0		0		0			0		0		0		0		0		0		0		0		0		0	4	0	10	0	0	0/4	0/10
10	Antibiotics	Sulfaquinoxaline	C1=CC=C2C(=C1)N=CC(=N2)NS(=O)(=O)C3=CC=C(C=C3)N	0		1		0		0			0		0		0		0		0		0		0		0		0		0	4	1	10	0	1	1/4	0/10
11	Antibiotics	Tetracycline	C[C@@]1([C@H]2C[C@H]3[C@@H](C(=O)C(=C([C@]3(C(=O)C2=C(C4=C1C=CC=C4O)O)O)O)C(=O)N)N(C)C)O	0		0		0		0		0		0		0		0		0		0			0	0		0			1	12	0	2	1	1	0/12	1/2
12	Antibiotics	Ketoconazole	CC(=O)N1CCN(CC1)C2=CC=C(C=C2)OC[C@H]3CO[C@](O3)(CN4C=CN=C4)C5=C(C=C(C=C5)Cl)Cl	1		1		1		1		0		1		1		1		0		1			0	1		1			0	12	10	2	0	10	10/12	0/2
13	Antibiotics	Sulfadiazine	C1=CN=C(N=C1)NS(=O)(=O)C2=CC=C(C=C2)N		0		0		0	0			0		0		0		0		0		0		0		0		0		1	1	0	13	1	1	0/1	1/13
14	Antibiotics	Norfloxacin	CCN1C=C(C(=O)C2=CC(=C(C=C21)N3CCNCC3)F)C(=O)O		0	0		0		0			0		0		0		0		0		0		0		0		0		0	3	0	11	0	0	0/3	0/11
15	Antibiotics	Sulfathiazole	C1=CC(=CC=C1N)S(=O)(=O)NC2=NC=CS2	0		0		0		0			0		0		0		0		0		0		0		0		0		1	4	0	10	1	1	0/4	1/10
16	Antibiotics	Sulfamethoxazole	CC1=CC(=NO1)NS(=O)(=O)C2=CC=C(C=C2)N		0	0		0		0			0		0		0		0		0		0		0		0		0		1	3	0	11	1	1	0/3	1/11
17	Antibiotics	Oxytetracycline	C[C@@]1([C@H]2[C@@H]([C@H]3[C@@H](C(=O)C(=C([C@]3(C(=O)C2=C(C4=C1C=CC=C4O)O)O)O)C(=O)N)N(C)C)O)O	0		1		0		0		0		1		0		0		0		0		0			0	0			0	12	2	2	0	2	2/12	0/2
18	Antibiotics	Fleroxacin	CN1CCN(CC1)C2=C(C=C3C(=C2F)N(C=C(C3=O)C(=O)O)CCF)F		0	0		0		0			0		0		0		0		0		0		0		0		0		0	3	0	11	0	0	0/3	0/11
19	Antibiotics	Roxithromycin	CC[C@@H]1[C@@]([C@@H]([C@H](/C(=N/OCOCCOC)/[C@@H](C[C@@]([C@@H]([C@H]([C@@H]([C@H](C(=O)O1)C)O[C@H]2C[C@@]([C@H]([C@@H](O2)C)O)(C)OC)C)O[C@H]3[C@@H]([C@H](C[C@H](O3)C)N(C)C)O)(C)O)C)C)O)(C)O	0		0		0		0			0		0		0		0		0		0		0		0		0		1	4	0	10	1	1	0/4	1/10
20	Antibiotics	Clarithromycin	CC[C@@H]1[C@@]([C@@H]([C@H](C(=O)[C@@H](C[C@@]([C@@H]([C@H]([C@@H]([C@H](C(=O)O1)C)O[C@H]2C[C@@]([C@H]([C@@H](O2)C)O)(C)OC)C)O[C@H]3[C@@H]([C@H](C[C@H](O3)C)N(C)C)O)(C)OC)C)C)O)(C)O		0	0		0		0			0		0		0		0		0		0		0		0		0		1	3	0	11	1	1	0/3	1/11
21	Antibiotics	Ofloxacin	CC1COC2=C3N1C=C(C(=O)C3=CC(=C2N4CCN(CC4)C)F)C(=O)O		0	0		0		0			0		0		0		0		0		0		0		0		0		0	3	0	11	0	0	0/3	0/11
22	Antibiotics	Azithromycin	CC[C@@H]1[C@@]([C@@H]([C@H](N(C[C@@H](C[C@@]([C@@H]([C@H]([C@@H]([C@H](C(=O)O1)C)O[C@H]2C[C@@]([C@H]([C@@H](O2)C)O)(C)OC)C)O[C@H]3[C@@H]([C@H](C[C@H](O3)C)N(C)C)O)(C)O)C)C)C)O)(C)O		0	0		0		0			0		0		0		0		0		0		0		0		0		1	3	0	11	1	1	0/3	1/11
23	Antibiotics	Ciprofloxacin	C1CC1N2C=C(C(=O)C3=CC(=C(C=C32)N4CCNCC4)F)C(=O)O	0			1		0		0	0		0		0		0		0		0		0			0	0			0	9	0	5	1	1	0/9	1/5
24	Antibiotics	Fluconazole	C1=CC(=C(C=C1F)F)C(CN2C=NC=N2)(CN3C=NC=N3)O	0		0		0		0		0		0		0		0		0		0			1	0		0			1	12	0	2	2	2	0/12	2/2
25	Antibiotics	Enrofloxacin	CCN1CCN(CC1)C2=C(C=C3C(=C2)N(C=C(C3=O)C(=O)O)C4CC4)F		1	0		0		0			0		0		0		0		0		0		0		0		0		0	3	0	11	1	1	0/3	1/11
26	Antibiotics	Sarafloxacin	C1CN(CCN1)C2=C(C=C3C(=C2)N(C=C(C3=O)C(=O)O)C4=CC=C(C=C4)F)F	0			0	0			0	0		0		0		0		0		0		0			0	0			0	10	0	4	0	0	0/10	0/4
27	BPs (Bisphenols)	3,3',5,5'-Tetrabromobisphenol A	CC(C)(C1=CC(=C(C(=C1)Br)O)Br)C2=CC(=C(C(=C2)Br)O)Br	1		1		0		1		1		1		1		1		1		1			0	1		1			1	12	11	2	1	12	11/12	1/2
28	BPs (Bisphenols)	Bisphenol AF	C1=CC(=CC=C1C(C2=CC=C(C=C2)O)(C(F)(F)F)C(F)(F)F)O	1		0		0		1		1		1		1		1		0		1			0	1		1			1	12	9	2	1	10	9/12	1/2
29	BPs (Bisphenols)	4,4'-(1-Phenylethylidene)bisphenol	CC(C1=CC=CC=C1)(C2=CC=C(C=C2)O)C3=CC=C(C=C3)O	1			1	0			1		1		1		1		1		0		1		0		1		1		0	2	1	12	9	10	1/2	9/12
30	BPs (Bisphenols)	Bis(4-hydroxyphenyl)methane	C1=CC(=CC=C1CC2=CC=C(C=C2)O)O	1		1		0		1		0		0		0		0		0		0		0			0	0			0	12	3	2	0	3	3/12	0/2
31	BPs (Bisphenols)	Bisphenol B	CCC(C)(C1=CC=C(C=C1)O)C2=CC=C(C=C2)O	1		1		0		1		1		1		1		1		0		0			0	0		1			1	12	8	2	1	9	8/12	1/2
32	BPs (Bisphenols)	Bisphenol E	CC(C1=CC=C(C=C1)O)C2=CC=C(C=C2)O	1		1		0		1			1		0		0		0		0		1		0		0		0		0	4	3	10	2	5	3/4	2/10
33	BPs (Bisphenols)	Bisphenol A	CC(C)(C1=CC=C(C=C1)O)C2=CC=C(C=C2)O	1		1		0		1		0		1		1		0		0		0			0	0		0			0	12	5	2	0	5	5/12	0/2
34	BPs (Bisphenols)	4,4'-Sulfonyldiphenol	C1=CC(=CC=C1O)S(=O)(=O)C2=CC=C(C=C2)O	0		0		0		0			1		1		1		0		0		1		0		1		1		0	4	0	10	6	6	0/4	6/10
35	BPs (Bisphenols)	Bisphenol Z	C1CCC(CC1)(C2=CC=C(C=C2)O)C3=CC=C(C=C3)O		1	1		1		1			1		1		1		0		0		0		0		0		1		1	3	3	11	6	9	3/3	6/11
36	EDCs (Endocrine Disrupting Chemicals)	Atrazine	CCNC1=NC(=NC(=N1)Cl)NC(C)C	0		0		0		0		0		0		0		0		0		0			1	0		1			0	12	1	2	1	2	1/12	1/2
37	EDCs (Endocrine Disrupting Chemicals)	Nandrolone	C[C@]12CC[C@H]3[C@H]([C@@H]1CC[C@@H]2O)CCC4=CC(=O)CC[C@H]34		0	1		0		0			0		1		1		0		0		0		0		1		0		0	3	1	11	3	4	1/3	3/11
38	EDCs (Endocrine Disrupting Chemicals)	Dexamethasone	C[C@@H]1C[C@H]2[C@@H]3CCC4=CC(=O)C=C[C@@]4([C@]3([C@H](C[C@@]2([C@]1(C(=O)CO)O)C)O)F)C		0	0		0		0			0		0		0		0		1		0		1		0		1		1	3	0	11	4	4	0/3	4/11
39	EDCs (Endocrine Disrupting Chemicals)	Methylprednisolone	C[C@H]1C[C@H]2[C@@H]3CC[C@@]([C@]3(C[C@@H]([C@@H]2[C@@]4(C1=CC(=O)C=C4)C)O)C)(C(=O)CO)O	0		0		0		0		0		0		0		0		1		0			1		0	1		0		12	2	2	1	3	2/12	1/2
40	EDCs (Endocrine Disrupting Chemicals)	4-(1,1,3,3-Tetramethylbutyl)phenol	CC(C)(C)CC(C)(C)C1=CC=C(C=C1)O	1		1		1		1		1		1		1		1		1		1			0	0		1			1	12	11	2	1	12	11/12	1/2
41	EDCs (Endocrine Disrupting Chemicals)	Corticosterone	C[C@]12CCC(=O)C=C1CC[C@@H]3[C@@H]2[C@H](C[C@]4([C@H]3CC[C@@H]4C(=O)CO)C)O	0		0		0		0		0		0		0		0		1		0			0	0		0			1	12	1	2	1	2	1/12	1/2
42	EDCs (Endocrine Disrupting Chemicals)	Hydrocortisone	C[C@]12CCC(=O)C=C1CC[C@@H]3[C@@H]2[C@H](C[C@]4([C@H]3CC[C@@]4(C(=O)CO)O)C)O		0	0		0		0			0		0		0		0		1		0		1		0		0		1	3	0	11	3	3	0/3	3/11
43	EDCs (Endocrine Disrupting Chemicals)	Prednisolone	C[C@]12C[C@@H]([C@H]3[C@H]([C@@H]1CC[C@@]2(C(=O)CO)O)CCC4=CC(=O)C=C[C@]34C)O	0		0		0		0			0		0		0		0		1		0		1		0		1		0	4	0	10	3	3	0/4	3/10
44	EDCs (Endocrine Disrupting Chemicals)	Estriol	C[C@]12CC[C@H]3[C@H]([C@@H]1C[C@H]([C@@H]2O)O)CCC4=C3C=CC(=C4)O	0		0		0		0		0		0		0		0		0		0		0			0	0			0	12	0	2	0	0	0/12	0/2
45	EDCs (Endocrine Disrupting Chemicals)	17beta-Estradiol	C[C@]12CC[C@H]3[C@H]([C@@H]1CC[C@@H]2O)CCC4=C3C=CC(=C4)O	0		0		0		1		0		1		1		0		0		0			0	0		0			0	12	3	2	0	3	3/12	0/2
46	EDCs (Endocrine Disrupting Chemicals)	Prednisone	C[C@]12CC(=O)[C@H]3[C@H]([C@@H]1CC[C@@]2(C(=O)CO)O)CCC4=CC(=O)C=C[C@]34C	0		0		0		0		0		0		0		0		1		0			1	0		0			1	12	1	2	2	3	1/12	2/2
47	EDCs (Endocrine Disrupting Chemicals)	Cortisone	C[C@]12CCC(=O)C=C1CC[C@@H]3[C@@H]2C(=O)C[C@]4([C@H]3CC[C@@]4(C(=O)CO)O)C	0		0		0		0			0		0		0		0		1		0		1		0		0		1	4	0	10	3	3	0/4	3/10
48	EDCs (Endocrine Disrupting Chemicals)	Estrone	C[C@]12CC[C@H]3[C@H]([C@@H]1CCC2=O)CCC4=C3C=CC(=C4)O	0		0		0		0		0		0		0		0		0		0			0	0		0			1	12	0	2	1	1	0/12	1/2
49	EDCs (Endocrine Disrupting Chemicals)	Androsterone	C[C@]12CC[C@H](C[C@@H]1CC[C@@H]3[C@@H]2CC[C@]4([C@H]3CCC4=O)C)O	0			0	0			0	0		0		0		0		0		0		0			0	0			0	10	0	4	0	0	0/10	0/4
50	EDCs (Endocrine Disrupting Chemicals)	17alpha-Ethinylestradiol	C[C@]12CC[C@H]3[C@H]([C@@H]1CC[C@]2(C#C)O)CCC4=C3C=CC(=C4)O	0		0		0		1		0		0		1		1		0		0			1	0		0			1	12	3	2	2	5	3/12	2/2
51	EDCs (Endocrine Disrupting Chemicals)	Progesterone	CC(=O)[C@H]1CC[C@@H]2[C@@]1(CC[C@H]3[C@H]2CCC4=CC(=O)CC[C@]34C)C	1		1		0		0		0		0		0		1		0		0			0	1		1			0	12	5	2	0	5	5/12	0/2
52	EDCs (Endocrine Disrupting Chemicals)	17alpha-Estradiol	C[C@]12CC[C@H]3[C@H]([C@@H]1CC[C@H]2O)CCC4=C3C=CC(=C4)O	0		1		0		1		0		1		1		1		0		0			0	0		0			0	12	5	2	0	5	5/12	0/2
53	EDCs (Endocrine Disrupting Chemicals)	17-Methyltestosterone	C[C@]12CCC(=O)C=C1CC[C@@H]3[C@@H]2CC[C@]4([C@H]3CC[C@]4(C)O)C	1		1		0		0		0		0		0		0		0		0			1	0		0			1	12	2	2	2	4	2/12	2/2
54	EDCs (Endocrine Disrupting Chemicals)	Testosterone	C[C@]12CC[C@H]3[C@H]([C@@H]1CC[C@@H]2O)CCC4=CC(=O)CC[C@]34C		0	1		0		0			0		0		0		1		0		0		0		1		0		0	3	1	11	2	3	1/3	2/11
55	EDCs (Endocrine Disrupting Chemicals)	Megestrol acetate	CC1=C[C@@H]2[C@H](CC[C@]3([C@H]2CC[C@@]3(C(=O)C)OC(=O)C)C)[C@@]4(C1=CC(=O)CC4)C		1	1		0		1			0		0		0		0		1		0		0		0		0		0	3	2	11	2	4	2/3	2/11
56	EDCs (Endocrine Disrupting Chemicals)	4-Androstene-3,17-dione	C[C@]12CCC(=O)C=C1CC[C@@H]3[C@@H]2CC[C@]4([C@H]3CCC4=O)C	0		0		0		0		0		0		0		0		0		0			0	1		0			0	12	1	2	0	1	1/12	0/2
57	EDCs (Endocrine Disrupting Chemicals)	Norethindrone	C[C@]12CC[C@H]3[C@H]([C@@H]1CC[C@]2(C#C)O)CCC4=CC(=O)CC[C@H]34	1		1		0		0		0		0		1		1		0		0			1	0		0			0	12	4	2	1	5	4/12	1/2
58	EDCs (Endocrine Disrupting Chemicals)	17alpha-Hydroxyprogesterone	CC(=O)[C@]1(CC[C@@H]2[C@@]1(CC[C@H]3[C@H]2CCC4=CC(=O)CC[C@]34C)C)O	0		1		0		0		0		0		0		0		1		0			1	0		0			1	12	2	2	2	4	2/12	2/2
59	EDCs (Endocrine Disrupting Chemicals)	Medroxyprogesterone acetate	C[C@H]1C[C@@H]2[C@H](CC[C@]3([C@H]2CC[C@@]3(C(=O)C)OC(=O)C)C)[C@@]4(C1=CC(=O)CC4)C	1		1		0		0		0		0		0		0		1		0		1			0	0			1	12	4	2	1	5	4/12	1/2
60	EDCs (Endocrine Disrupting Chemicals)	Levonorgestrel	CC[C@]12CC[C@H]3[C@H]([C@@H]1CC[C@]2(C#C)O)CCC4=CC(=O)CC[C@H]34	0		0		0		0		0		0		0		0		0		0			1	1		0			0	12	1	2	1	2	1/12	1/2
61	OPEs (Organophosphate Esters)	Phosphoric acid, dibutyl ester	CCCCOP(=O)(O)OCCCC	0		0		0		0			0		1		0		0		0		0		0		0		0		0	4	0	10	1	1	0/4	1/10
62	OPEs (Organophosphate Esters)	Triphenyl phosphate	C1=CC=C(C=C1)OP(=O)(OC2=CC=CC=C2)OC3=CC=CC=C3	1		1		0		1		1		0		1		1		0		0			1	0		1			0	12	7	2	1	8	7/12	1/2
63	OPEs (Organophosphate Esters)	Tris(2-chloroethyl) phosphate	C(CCl)OP(=O)(OCCCl)OCCCl	0		0		0		0		0		0		0		0		0		0			0	0		0			0	12	0	2	0	0	0/12	0/2
64	OPEs (Organophosphate Esters)	Triisobutyl phosphate	CC(C)COP(=O)(OCC(C)C)OCC(C)C	1		0		0		0		0		0		0		0		0		0		0			0	0			0	12	1	2	0	1	1/12	0/2
65	OPEs (Organophosphate Esters)	Tributyl phosphate	CCCCOP(=O)(OCCCC)OCCCC	0		0		0		0		0		0		0		0		0		0			0	0		0			0	12	0	2	0	0	0/12	0/2
66	OPEs (Organophosphate Esters)	Tris(2-chloroisopropyl)phosphate	CC(CCl)OP(=O)(OC(C)CCl)OC(C)CCl	0		0		0		0		0		0		0		0		0		0		0			0	0			0	12	0	2	0	0	0/12	0/2
67	OPEs (Organophosphate Esters)	Trimethyl orthophosphate	COP(=O)(OC)OC	0		0		0		0			0		0		0		0		0		0		0		0		0		0	4	0	10	0	0	0/4	0/10
68	OPEs (Organophosphate Esters)	Triethyl phosphate	CCOP(=O)(OCC)OCC	0		0		0		0			0		0		0		0		0		0		0		0		0		0	4	0	10	0	0	0/4	0/10
69	OPEs (Organophosphate Esters)	Tris(2-butoxyethyl) phosphate	CCCCOCCOP(=O)(OCCOCCCC)OCCOCCCC	0		1		0		0		0		0		0		1		0		0		0			0	0			1	12	2	2	1	3	2/12	1/2
70	OPEs (Organophosphate Esters)	Triphenylphosphine oxide	C1=CC=C(C=C1)P(=O)(C2=CC=CC=C2)C3=CC=CC=C3	0		0		0		0		0		0		0		0		0		0		0			0	0			0	12	0	2	0	0	0/12	0/2
71	OPEs (Organophosphate Esters)	Diphenyl phosphate	C1=CC=C(C=C1)OP(=O)(O)OC2=CC=CC=C2	0		0		0		0			1		0		0		0		0		0		1		0		1		0	4	0	10	3	3	0/4	3/10
72	PAHs (Polycyclic Aromatic Hydrocarbons)	Anthracene	C1=CC=C2C=C3C=CC=CC3=CC2=C1	0		0		0		0		0		0		0		0		0		0			0	0		0			0	12	0	2	0	0	0/12	0/2
73	PAHs (Polycyclic Aromatic Hydrocarbons)	Pyrene	C1=CC2=C3C(=C1)C=CC4=CC=CC(=C43)C=C2	0		0		0		1		1		0		0		0		0		0			0	0		0			0	12	2	2	0	2	2/12	0/2
74	PAHs (Polycyclic Aromatic Hydrocarbons)	Benzo(b)fluoranthene	C1=CC=C2C3=C4C(=CC=C3)C5=CC=CC=C5C4=CC2=C1	1		1		0		1		0		0		0		0		0		0			0	0		1			0	12	4	2	0	4	4/12	0/2
75	PAHs (Polycyclic Aromatic Hydrocarbons)	Fluoranthene	C1=CC=C2C(=C1)C3=CC=CC4=C3C2=CC=C4	0		0		0		1		1		0		0		0		0		0			0	0		1			0	12	3	2	0	3	3/12	0/2
76	PAHs (Polycyclic Aromatic Hydrocarbons)	Benzo[k]fluoranthene	C1=CC=C2C=C3C4=CC=CC5=C4C(=CC=C5)C3=CC2=C1		0	1		1		0			1		0		0		0		0		0		0		0		1		1	3	2	11	3	5	2/3	3/11
77	PAHs (Polycyclic Aromatic Hydrocarbons)	Acenaphthylene	C1=CC2=C3C(=C1)C=CC3=CC=C2	0		0		0		0		0		0		0		0		0		0			0	0		0			1	12	0	2	1	1	0/12	1/2
78	PAHs (Polycyclic Aromatic Hydrocarbons)	Chrysene	C1=CC=C2C(=C1)C=CC3=C2C=CC4=CC=CC=C43		0	1		0		0			0		1		0		0		0		0		1		0		0		0	3	1	11	2	3	1/3	2/11
79	PAHs (Polycyclic Aromatic Hydrocarbons)	Benz(a)anthracene	C1=CC=C2C(=C1)C=CC3=CC4=CC=CC=C4C=C32	1		1		0		1		0		0		0		0		0		0			0	0		0			0	12	3	2	0	3	3/12	0/2
80	PAHs (Polycyclic Aromatic Hydrocarbons)	Acenaphthene	C1CC2=CC=CC3=C2C1=CC=C3	0		0		0		0		0		0		0		0		0		0			0	0		0			0	12	0	2	0	0	0/12	0/2
81	PAHs (Polycyclic Aromatic Hydrocarbons)	Phenanthrene	C1=CC=C2C(=C1)C=CC3=CC=CC=C32	0		0		0		0		0		0		0		0		0		0			1	0		0			0	12	0	2	1	1	0/12	1/2
82	PAHs (Polycyclic Aromatic Hydrocarbons)	Fluorene	C1C2=CC=CC=C2C3=CC=CC=C31	0		1		0		0		0		0		0		0		0		0			0	0		0			0	12	1	2	0	1	1/12	0/2
83	PAHs (Polycyclic Aromatic Hydrocarbons)	Naphthalene	C1=CC=C2C=CC=CC2=C1	0		0		0		0		0		0		0		0		0		0			0	0		0			0	12	0	2	0	0	0/12	0/2
84	PCBs (Polychlorinated Biphenyls)	2,2',4,4',5,5'-Hexachlorobiphenyl	C1=C(C(=CC(=C1Cl)Cl)Cl)C2=CC(=C(C=C2Cl)Cl)Cl		1	0		0		0			0		0		1		1		0		0		0		0		0		1	3	0	11	4	4	0/3	4/11
85	Pesticides	Chlorpropham	CC(C)OC(=O)NC1=CC(=CC=C1)Cl	1		0		0		1		0		0		0		0		0		0			0	0		0			0	12	2	2	0	2	2/12	0/2
86	Pesticides	Flufenoxuron	C1=CC(=C(C(=C1)F)C(=O)NC(=O)NC2=C(C=C(C=C2)OC3=C(C=C(C=C3)C(F)(F)F)Cl)F)F	1		1		0		1			0		0		0		0		0		0		0		0		1		1	4	3	10	2	5	3/4	2/10
87	Pesticides	Carbendazim	COC(=O)NC1=NC2=CC=CC=C2N1	1		0		1		0		0		0		1		0		0		0			0	0		0			0	12	3	2	0	3	3/12	0/2
88	Pesticides	Tebuconazole	CC(C)(C)C(CCC1=CC=C(C=C1)Cl)(CN2C=NC=N2)O	1		0		0		0		0		0		0		0		0		0			0	0		0			1	12	1	2	1	2	1/12	1/2
89	Pesticides	Dimethomorph	COC1=C(C=C(C=C1)/C(=C/C(=O)N2CCOCC2)/C3=CC=C(C=C3)Cl)OC	1		0		0		0		0		0		0		0		0		0			0	0		1			1	12	2	2	1	3	2/12	1/2
90	Pesticides	Omethoate	CNC(=O)CSP(=O)(OC)OC	0		0		0		0			0		0		0		0		0		0		0		0		0		1	4	0	10	1	1	0/4	1/10
91	Pesticides	4-(4-Chlorophenyl)-2-phenyl-2-(1H-1,2,4-triazol-1-ylmethyl)butyronitrile	C1=CC=C(C=C1)C(CCC2=CC=C(C=C2)Cl)(CN3C=NC=N3)C#N	1		0		0		0		0		0		0		0		0		0			0	1		0			0	12	2	2	0	2	2/12	0/2
92	Pesticides	Dicofol	C1=CC(=CC=C1C(C2=CC=C(C=C2)Cl)(C(Cl)(Cl)Cl)O)Cl	0		1		0		1		1		1		1		1		1		1			1	1		1			0	12	10	2	1	11	10/12	1/2
93	Pesticides	Aldicarb	CC(C)(/C=N/OC(=O)NC)SC	0		0		0		0		0		0		0		0		0		0			1	0		0			1	12	0	2	2	2	0/12	2/2
94	Pesticides	Difenoconazole	CC1COC(O1)(CN2C=NC=N2)C3=C(C=C(C=C3)OC4=CC=C(C=C4)Cl)Cl	1		1		0		1		1		1		1		1		0		1			0	1		1			1	12	10	2	1	11	10/12	1/2
95	Pesticides	Fipronil	C1=C(C=C(C(=C1Cl)N2C(=C(C(=N2)C#N)S(=O)C(F)(F)F)N)Cl)C(F)(F)F	1		1		0		1		1		0		1		1		0		0			0	1		1			1	12	8	2	1	9	8/12	1/2
96	Pesticides	Malathion	CCOC(=O)CC(C(=O)OCC)SP(=S)(OC)OC	1		1		0		0		0		0		0		0		0		0			0	0		0			1	12	2	2	1	3	2/12	1/2
97	Pesticides	Cyprodinil	CC1=CC(=NC(=N1)NC2=CC=CC=C2)C3CC3	0		1		0		1		0		0		1		0		0		0			0	0		1			1	12	4	2	1	5	4/12	1/2
98	Pesticides	4-Bromo-2-(4-chlorophenyl)-1-(ethoxymethyl)-5-(trifluoromethyl)-1H-pyrrole-3-carbonitrile	CCOCN1C(=C(C(=C1C(F)(F)F)Br)C#N)C2=CC=C(C=C2)Cl	0		0		0		1			0		1		0		0		0		0		0		0		1		1	4	1	10	3	4	1/4	3/10
99	Pesticides	Terbufos	CCOP(=S)(OCC)SCSC(C)(C)C	1		0		0		1		0		0		0		0		0		0			0	0		1			0	12	3	2	0	3	3/12	0/2
100	Pesticides	Fludioxonil	C1=CC(=C2C(=C1)OC(O2)(F)F)C3=CNC=C3C#N	1		0		0		1		1		0		1		1		0		0			0	0		0			1	12	5	2	1	6	5/12	1/2
101	Pesticides	Phosphamidon	CCN(CC)C(=O)/C(=C(\C)/OP(=O)(OC)OC)/Cl	1		0		0		0		0		0		0		0		0		0		0			0	0			1	12	1	2	1	2	1/12	1/2
102	Pesticides	Azoxystrobin	CO/C=C(\C1=CC=CC=C1OC2=NC=NC(=C2)OC3=CC=CC=C3C#N)/C(=O)OC	1		1		0		0		1		0		1		1		0		0			0	1		1			1	12	7	2	1	8	7/12	1/2
103	Pesticides	Ethoprop	CCCSP(=O)(OCC)SCCC	1		0		0		0		0		0		0		0		0		0			0	0		0			0	12	1	2	0	1	1/12	0/2
104	Pesticides	Epoxiconazole	C1=CC=C(C(=C1)[C@@H]2[C@@](O2)(CN3C=NC=N3)C4=CC=C(C=C4)F)Cl	1		0		0		0			0		0		0		0		0		0		0		0		0		1	4	1	10	1	2	1/4	1/10
105	Pesticides	DEET	CCN(CC)C(=O)C1=CC=CC(=C1)C	0		0		0		0		0		0		0		0		0		0			0	0		0			1	12	0	2	1	1	0/12	1/2
106	Pesticides	(1E)-N-[(6-Chloro-3-pyridinyl)methyl]-N'-cyano-N-methylethanimidamide	CC(=NC#N)N(C)CC1=CN=C(C=C1)Cl	0		0		0		0		0		0		0		0		0		0			1	0		0			0	12	0	2	1	1	0/12	1/2
107	Pesticides	Quinalphos	CCOP(=S)(OCC)OC1=NC2=CC=CC=C2N=C1		1	1		0		1			0		1		0		0		0		0		0		0		0		1	3	2	11	3	5	2/3	3/11
108	Pesticides	Imidacloprid	C1CN(/C(=N/[N+](=O)[O-])/N1)CC2=CN=C(C=C2)Cl	0		0		0		0		0		0		0		0		0		0			0	0		0			0	12	0	2	0	0	0/12	0/2
109	Pesticides	Dicrotophos	C/C(=C\C(=O)N(C)C)/OP(=O)(OC)OC	0		0		0		0		0		0		0		0		0		0			1	0		0			0	12	0	2	1	1	0/12	1/2
110	Pesticides	Trifloxystrobin	C/C(=N\OCC1=CC=CC=C1/C(=N\OC)/C(=O)OC)/C2=CC(=CC=C2)C(F)(F)F	1		1		0		1		0		0		0		1		0		1			0	0		1			0	12	6	2	0	6	6/12	0/2
111	Pesticides	Thiabendazole	C1=CC=C2C(=C1)NC(=N2)C3=CSC=N3	1		0		0		0		0		0		0		0		0		0			0	0		0			0	12	1	2	0	1	1/12	0/2
112	Pesticides	Phoxim	CCOP(=S)(OCC)O/N=C(\C#N)/C1=CC=CC=C1	1		0		0		0			1		1		1		0		0		0		0		0		1		0	4	1	10	4	5	1/4	4/10
113	Pesticides	Thiamethoxam	CN\1COCN(/C1=N/[N+](=O)[O-])CC2=CN=C(S2)Cl	0		0		0		0		0		0		0		0		0		0			1	0		0			0	12	0	2	1	1	0/12	1/2
114	Pesticides	Emamectin benzoate	CC[C@H](C)[C@@H]1[C@H](C=C[C@@]2(O1)C[C@@H]3C[C@H](O2)C/C=C(/[C@H]([C@H](/C=C/C=C/4\CO[C@H]5[C@@]4([C@@H](C=C([C@H]5O)C)C(=O)O3)O)C)O[C@H]6C[C@@H]([C@H]([C@@H](O6)C)O[C@H]7C[C@@H]([C@H]([C@@H](O7)C)NC)OC)OC)\C)C	0		0		1		1		1		1		1		1		1		1			0	1		1			0	12	10	2	0	10	10/12	0/2
115	Pesticides	Zoxamide	CCC(C)(C(=O)CCl)NC(=O)C1=CC(=C(C(=C1)Cl)C)Cl	1		1		1		1		1		1		1		0		0		1			0	0		1			0	12	9	2	0	9	9/12	0/2
116	Pesticides	Carbofuran	CC1(CC2=C(O1)C(=CC=C2)OC(=O)NC)C	0		0		0		0		0		0		0		0		0		0			1	0		0			0	12	0	2	1	1	0/12	1/2
117	Pesticides	Aldicarb sulfoxide	CC(C)(/C=N/OC(=O)NC)S(=O)C	1		0		0		0			0		0		0		0		0		0		1		0		0		0	4	1	10	1	2	1/4	1/10
118	Pesticides	Aldicarb sulfone	CC(C)(/C=N/OC(=O)NC)S(=O)(=O)C	0		0		0		0			0		0		0		0		0		0		1		0		0		0	4	0	10	1	1	0/4	1/10
119	Pesticides	Methomyl	CC(=NOC(=O)NC)SC	0		0		0		0		0		0		0		0		0		0			1	0		0			0	12	0	2	1	1	0/12	1/2
120	Pesticides	Pyraclostrobin	COC(=O)N(C1=CC=CC=C1COC2=NN(C=C2)C3=CC=C(C=C3)Cl)OC	1		1		0		1		0		0		1		1		1		1			0	1		1			0	12	9	2	0	9	9/12	0/2
121	Pesticides	Boscalid	C1=CC=C(C(=C1)C2=CC=C(C=C2)Cl)NC(=O)C3=C(N=CC=C3)Cl	1		0		0		0		0		0		0		0		0		0			1	0		0			1	12	1	2	2	3	1/12	2/2
122	Pesticides	Chlorothalonil	C(#N)C1=C(C(=C(C(=C1Cl)Cl)Cl)C#N)Cl	1		0		0		1		1		1		1		1		1		1			1	0		1			0	12	9	2	1	10	9/12	1/2
123	Pesticides	Methiocarb	CC1=CC(=CC(=C1SC)C)OC(=O)NC	0			0	0			0	1		0		1		0		0		0		1			0	0			0	10	3	4	0	3	3/10	0/4
124	Pesticides	Fenamiphos	CCOP(=O)(NC(C)C)OC1=CC(=C(C=C1)SC)C	1		0		0		0		0		0		0		0		0		0			1	0		0			1	12	1	2	2	3	1/12	2/2
125	Pesticides	Phosalone	CCOP(=S)(OCC)SCN1C2=C(C=C(C=C2)Cl)OC1=O	1		1		0		1		1		1		1		0		1		0			0	0		1			1	12	8	2	1	9	8/12	1/2
126	Pesticides	Pirimicarb	CC1=C(N=C(N=C1OC(=O)N(C)C)N(C)C)C	0		0		0		0		0		0		0		0		0		0			1	0		0			0	12	0	2	1	1	0/12	1/2
127	Pesticides	Thiophanate-methyl	COC(=O)NC(=S)NC1=CC=CC=C1NC(=S)NC(=O)OC	1		1		0		0		1		0		0		0		0		0			0	0		1			1	12	4	2	1	5	4/12	1/2
128	Pesticides	Triazophos	CCOP(=S)(OCC)OC1=NN(C=N1)C2=CC=CC=C2		1	0		0		1			0		1		0		0		0		0		0		0		1		1	3	1	11	4	5	1/3	4/11
129	Pesticides	Isocarbophos	CC(C)OC(=O)C1=CC=CC=C1OP(=S)(N)OC		1	0		0		0			0		0		0		0		0		0		0		0		0		0	3	0	11	1	1	0/3	1/11
130	Pesticides	Isoprocarb	CC(C)C1=CC=CC=C1OC(=O)NC		0	0		0		0			0		0		0		0		0		0		0		0		0		0	3	0	11	0	0	0/3	0/11
131	Pesticides	Chlorpyrifos	CCOP(=S)(OCC)OC1=NC(=C(C=C1Cl)Cl)Cl	1		0		0		1		1		1		1		1		0		0			0	0		1			1	12	7	2	1	8	7/12	1/2
132	Pesticides	Pirimiphos-methyl	CCN(CC)C1=NC(=CC(=N1)OP(=S)(OC)OC)C	0		1		0		1		0		1		1		0		0		0			0	0		1			1	12	5	2	1	6	5/12	1/2
133	Pesticides	Methyl parathion	COP(=S)(OC)OC1=CC=C(C=C1)[N+](=O)[O-]	0		0		0		0		1		0		0		1		0		0			0	0		1			1	12	3	2	1	4	3/12	1/2
134	Pesticides	Phorate	CCOP(=S)(OCC)SCSCC	1		0		0		0		0		0		0		0		0		0			0	0		0			0	12	1	2	0	1	1/12	0/2
135	Pesticides	Phenthoate	CCOC(=O)C(C1=CC=CC=C1)SP(=S)(OC)OC	1		0		0		0		1		1		1		0		0		0		0			0	0			0	12	4	2	0	4	4/12	0/2
136	Pesticides	Procymidone	CC12CC1(C(=O)N(C2=O)C3=CC(=CC(=C3)Cl)Cl)C	0		1		0		0		0		0		0		0		0		0			1	0		0			1	12	1	2	2	3	1/12	2/2
137	Pesticides	Diazinon	CCOP(=S)(OCC)OC1=NC(=NC(=C1)C)C(C)C	1		0		0		0		0		0		0		0		0		0			0	0		0			1	12	1	2	1	2	1/12	1/2
138	Pesticides	Diflubenzuron	C1=CC(=C(C(=C1)F)C(=O)NC(=O)NC2=CC=C(C=C2)Cl)F	0		0		0		0			0		0		0		0		0		0		0		0		1		1	4	0	10	2	2	0/4	2/10
139	Pesticides	Iprodione	CC(C)NC(=O)N1CC(=O)N(C1=O)C2=CC(=CC(=C2)Cl)Cl	1		1		0		0		0		0		0		0		0		0			1	0		1			1	12	3	2	2	5	3/12	2/2
140	Pesticides	Sulfotep	CCOP(=S)(OCC)OP(=S)(OCC)OCC	0		0		0		0		1		1		1		0		0		0		0			0	1			0	12	4	2	0	4	4/12	0/2
141	Pesticides	Fenpropathrin	CC1(C(C1(C)C)C(=O)OC(C#N)C2=CC(=CC=C2)OC3=CC=CC=C3)C	0		0		0		1		0		0		0		0		0		0			1	0		1			1	12	2	2	2	4	2/12	2/2
142	Pesticides	Phorate sulfone	CCOP(=S)(OCC)SCS(=O)(=O)CC	0			0	0			0	0		0		0		0		0		0		0			0	0			0	10	0	4	0	0	0/10	0/4
143	Pesticides	Pendimethalin	CCC(CC)NC1=C(C=C(C(=C1[N+](=O)[O-])C)C)[N+](=O)[O-]	1		1		0		1		1		1		1		1		0		0			1	0		1			1	12	8	2	2	10	8/12	2/2
144	Pesticides	Profenofos	CCCSP(=O)(OCC)OC1=C(C=C(C=C1)Br)Cl	1		0		0		1		1		1		1		0		0		0			0	0		1			1	12	6	2	1	7	6/12	1/2
145	Pesticides	Isazofos	CCOP(=S)(OCC)OC1=NN(C(=N1)Cl)C(C)C	1		0		0		0		0		0		0		0		0		0			0	0		0			0	12	1	2	0	1	1/12	0/2
146	Pesticides	Triadimefon	CC(C)(C)C(=O)C(N1C=NC=N1)OC2=CC=C(C=C2)Cl	1		0		0		0		0		0		0		0		0		0			0	0		0			1	12	1	2	1	2	1/12	1/2
147	Pesticides	DDT	C1=CC(=CC=C1C(C2=CC=C(C=C2)Cl)C(Cl)(Cl)Cl)Cl	1		0		0		1		1		1		1		1		0		1			0	0		1			0	12	8	2	0	8	8/12	0/2
148	Pesticides	Vinclozolin	CC1(C(=O)N(C(=O)O1)C2=CC(=CC(=C2)Cl)Cl)C=C	0		0		0		1		0		0		0		0		0		0			0	0		0			1	12	1	2	1	2	1/12	1/2
149	Pesticides	Metolachlor	CCC1=CC=CC(=C1N(C(C)COC)C(=O)CCl)C	1		1		0		0		0		0		1		0		0		0			0	0		0			0	12	3	2	0	3	3/12	0/2
150	Pesticides	Trichlorfon	COP(=O)(C(C(Cl)(Cl)Cl)O)OC	1		1		0		0		0		0		0		0		0		0			0	0		1			1	12	3	2	1	4	3/12	1/2
151	Pesticides	Cypermethrin	CC1(C(C1C(=O)OC(C#N)C2=CC(=CC=C2)OC3=CC=CC=C3)C=C(Cl)Cl)C	1		0		0		1		0		0		0		0		0		0			1	0		0			1	12	2	2	2	4	2/12	2/2
152	Pesticides	Permethrin	CC1(C(C1C(=O)OCC2=CC(=CC=C2)OC3=CC=CC=C3)C=C(Cl)Cl)C	1		0		0		0		0		0		0		0		0		0			0	0		0			1	12	1	2	1	2	1/12	1/2
153	Pesticides	Deltamethrin	CC1([C@H]([C@H]1C(=O)O[C@H](C#N)C2=CC(=CC=C2)OC3=CC=CC=C3)C=C(Br)Br)C	0		0		0		1		0		0		0		0		0		0		1			0	1			1	12	3	2	1	4	3/12	1/2
154	Pesticides	Pyrimethanil	CC1=CC(=NC(=N1)NC2=CC=CC=C2)C	1		0		0		0		0		0		0		0		0		0			0	0		1			1	12	2	2	1	3	2/12	1/2
155	Pesticides	Fenthion	CC1=C(C=CC(=C1)OP(=S)(OC)OC)SC	1		0		0		1		0		0		0		0		0		0			0	0		1			0	12	3	2	0	3	3/12	0/2
156	Pesticides	Bitertanol	CC(C)(C)C(C(N1C=NC=N1)OC2=CC=C(C=C2)C3=CC=CC=C3)O	1			0	0			0	1		0		0		0		0		0		0			0	0			1	10	2	4	1	3	2/10	1/4
157	Pesticides	Triadimenol	CC(C)(C)C(C(N1C=NC=N1)OC2=CC=C(C=C2)Cl)O	0		0		0		0		0		0		0		0		0		0			0	0		0			1	12	0	2	1	1	0/12	1/2
158	Pesticides	Carbosulfan	CCCCN(CCCC)SN(C)C(=O)OC1=CC=CC2=C1OC(C2)(C)C	1		0		0		1		1		1		1		1		0		1			1	0		1			1	12	8	2	2	10	8/12	2/2
159	Pesticides	Chlorpyrifos-methyl	COP(=S)(OC)OC1=NC(=C(C=C1Cl)Cl)Cl	1		0		0		1		0		1		0		0		0		0			0	0		1			0	12	4	2	0	4	4/12	0/2
160	Pesticides	Parathion	CCOP(=S)(OCC)OC1=CC=C(C=C1)[N+](=O)[O-]	1		0		0		1		0		1		1		0		0		0			0	0		1			1	12	5	2	1	6	5/12	1/2
161	Pesticides	Coumaphos	CCOP(=S)(OCC)OC1=CC2=C(C=C1)C(=C(C(=O)O2)Cl)C	1		0		0		1		0		1		0		0		0		0			0	0		0			1	12	3	2	1	4	3/12	1/2
162	Pesticides	Terbufos sulfone	CCOP(=S)(OCC)SCS(=O)(=O)C(C)(C)C	0			0	0			0	0		0		0		0		0		0		0			0	0			0	10	0	4	0	0	0/10	0/4
163	Pesticides	Metalaxyl	CC1=C(C(=CC=C1)C)N(C(C)C(=O)OC)C(=O)COC	1		0		0		0		0		0		0		0		0		0			0	0		0			1	12	1	2	1	2	1/12	1/2
164	Pesticides	Lindane	C1(C(C(C(C(C1Cl)Cl)Cl)Cl)Cl)Cl	0		0		0		0		0		0		0		0		0		0			0	0		0			0	12	0	2	0	0	0/12	0/2
165	Pesticides	Dimethoate	CNC(=O)CSP(=S)(OC)OC	0		0		0		0		0		0		0		0		0		0			0	0		0			1	12	0	2	1	1	0/12	1/2
166	Pesticides	Fenarimol	C1=CC=C(C(=C1)C(C2=CC=C(C=C2)Cl)(C3=CN=CN=C3)O)Cl	1		1		0		1		0		0		0		0		0		0			0	1		1			0	12	5	2	0	5	5/12	0/2
167	Pesticides	Propiconazole	CCCC1COC(O1)(CN2C=NC=N2)C3=C(C=C(C=C3)Cl)Cl	1		1		0		0		0		0		0		0		0		0			0	1		0			1	12	3	2	1	4	3/12	1/2
168	Pesticides	Dichlorvos	COP(=O)(OC)OC=C(Cl)Cl	1		1		0		0		0		0		1		0		0		0			0	0		1			1	12	4	2	1	5	4/12	1/2
169	Pesticides	Carbaryl	CNC(=O)OC1=CC=CC2=CC=CC=C21	1		1		0		0		1		1		1		0		0		0			0	0		0			0	12	5	2	0	5	5/12	0/2
170	Pesticides	Penconazole	CCCC(CN1C=NC=N1)C2=C(C=C(C=C2)Cl)Cl		1	1		0		0			0		0		0		0		0		0		0		1		0		1	3	1	11	3	4	1/3	3/11
171	Pesticides	Prochloraz	CCCN(CCOC1=C(C=C(C=C1Cl)Cl)Cl)C(=O)N2C=CN=C2	1		1		0		0		0		0		0		0		0		0			0	1		1			1	12	4	2	1	5	4/12	1/2
172	Pesticides	alpha-Cyhalothrin	CC1(C(C1C(=O)OC(C#N)C2=CC(=CC=C2)OC3=CC=CC=C3)/C=C(/C(F)(F)F)\Cl)C		0	0		0		1			0		0		0		0		0		0		1		0		0		1	3	1	11	2	3	1/3	2/11
173	Pesticides	Forchlorfenuron	C1=CC=C(C=C1)NC(=O)NC2=CC(=NC=C2)Cl	1		0		0		1		0		0		0		0		1		0			1	1		1			0	12	5	2	1	6	5/12	1/2
174	Pesticides	Cyfluthrin	CC1(C(C1C(=O)OC(C#N)C2=CC(=C(C=C2)F)OC3=CC=CC=C3)C=C(Cl)Cl)C	1		0		0		1		0		0		0		0		0		0			1	0		0			1	12	2	2	2	4	2/12	2/2
175	Pesticides	Monocrotophos	C/C(=C\C(=O)NC)/OP(=O)(OC)OC	0		0		0		0		0		0		0		0		0		0			0	0		0			0	12	0	2	0	0	0/12	0/2
176	Pesticides	Fluvalinate	CC(C)C(C(=O)OC(C#N)C1=CC(=CC=C1)OC2=CC=CC=C2)NC3=C(C=C(C=C3)C(F)(F)F)Cl		1	0		0		1			0		0		0		0		0		0		0		0		1		1	3	1	11	3	4	1/3	3/11
177	Pesticides	Flucythrinate	CC(C)C(C1=CC=C(C=C1)OC(F)F)C(=O)OC(C#N)C2=CC(=CC=C2)OC3=CC=CC=C3	0		0		0		0			0		0		0		0		0		0		0		0		0		0	4	0	10	0	0	0/4	0/10
178	Pesticides	Chlorfluazuron	C1=CC(=C(C(=C1)F)C(=O)NC(=O)NC2=CC(=C(C(=C2)Cl)OC3=C(C=C(C=N3)C(F)(F)F)Cl)Cl)F	1		1		0		1			0		0		0		0		0		0		0		0		0		1	4	3	10	1	4	3/4	1/10
179	Pesticides	Benalaxyl	CC1=C(C(=CC=C1)C)N(C(C)C(=O)OC)C(=O)CC2=CC=CC=C2		1	1		0		0			0		0		0		0		0		0		0		0		0		1	3	1	11	2	3	1/3	2/11
180	Pesticides	Abamectin	CCC(C)[C@@H]1[C@H](C=C[C@@]2(O1)C[C@@H]3C[C@H](O2)C/C=C(/[C@H]([C@H](/C=C/C=C/4\CO[C@H]5[C@@]4([C@@H](C=C([C@H]5O)C)C(=O)O3)O)C)O[C@H]6C[C@@H]([C@H]([C@@H](O6)C)O[C@H]7C[C@@H]([C@H]([C@@H](O7)C)O)OC)OC)\C)C	0		0		1		1		1		1		1		1		1		1			0	1		1			0	12	10	2	0	10	10/12	0/2
181	Pesticides	p,p'-DDD	C1=CC(=CC=C1C(C2=CC=C(C=C2)Cl)C(Cl)Cl)Cl	1		1		0		1		1		1		1		1		0		1			1	0		1			0	12	9	2	1	10	9/12	1/2
182	Pesticides	p,p'-DDE	C1=CC(=CC=C1C(=C(Cl)Cl)C2=CC=C(C=C2)Cl)Cl	1		0		0		1		1		1		1		1		0		1			1	0		1			0	12	8	2	1	9	8/12	1/2
183	Pesticides	Prometryn	CC(C)NC1=NC(=NC(=N1)SC)NC(C)C	1		1		0		0		0		0		0		0		0		0			1	0		0			0	12	2	2	1	3	2/12	1/2
184	Pesticides	Phosmet	COP(=S)(OC)SCN1C(=O)C2=CC=CC=C2C1=O	0		0		0		0		0		0		0		0		0		0			0	0		0			0	12	0	2	0	0	0/12	0/2
185	Pesticides	Clofentezine	C1=CC=C(C(=C1)C2=NN=C(N=N2)C3=CC=CC=C3Cl)Cl	1		0		0		0		0		0		0		0		0		0			1	0		0			0	12	1	2	1	2	1/12	1/2
186	Pesticides	Paclobutrazol	CC(C)(C)[C@H]([C@@H](CC1=CC=C(C=C1)Cl)N2C=NC=N2)O	1		0		0		0		0		0		0		0		0		0			0	0		1			1	12	2	2	1	3	2/12	1/2
187	Pesticides	o,p'-DDT	C1=CC=C(C(=C1)C(C2=CC=C(C=C2)Cl)C(Cl)(Cl)Cl)Cl	1		0		0		1		1		1		1		1		0		1			0	0		1			1	12	8	2	1	9	8/12	1/2
188	Pesticides	Fluazinam	C1=C(C=NC(=C1Cl)NC2=C(C=C(C(=C2[N+](=O)[O-])Cl)C(F)(F)F)[N+](=O)[O-])C(F)(F)F	0		0		0		1		1		1		1		1		1		1		1		1		1			1	13	10	1	1	11	10/13	1/1
189	Pesticides	Hexaconazole	CCCCC(CN1C=NC=N1)(C2=C(C=C(C=C2)Cl)Cl)O	1		1		1		1		0		0		0		0		0		0			0	1		1			1	12	6	2	1	7	6/12	1/2
190	Pesticides	Etofenprox	CCOC1=CC=C(C=C1)C(C)(C)COCC2=CC(=CC=C2)OC3=CC=CC=C3	0		0		0		0		0		0		0		0		0		0			0	0		0			1	12	0	2	1	1	0/12	1/2
191	Pesticides	Pentachloronitrobenzene	C1(=C(C(=C(C(=C1Cl)Cl)Cl)Cl)Cl)[N+](=O)[O-]	1		1		0		0		1		1		1		0		1		0			1	1		1			0	12	8	2	1	9	8/12	1/2
192	Pesticides	Ametryn	CCNC1=NC(=NC(=N1)SC)NC(C)C	0		0		0		0		0		0		0		0		0		0			1	0		0			0	12	0	2	1	1	0/12	1/2
193	Pesticides	Diniconazole	CC(C)(C)C(/C(=C\C1=C(C=C(C=C1)Cl)Cl)/N2C=NC=N2)O	0		1		0		1		1		1		1		1		0		0			0	1		1			1	12	8	2	1	9	8/12	1/2
194	Pesticides	Flusilazole	C[Si](CN1C=NC=N1)(C2=CC=C(C=C2)F)C3=CC=C(C=C3)F	1		0		0		1		0		0		0		0		0		0			0	1		1			0	12	4	2	0	4	4/12	0/2
195	Pesticides	Azinphos-methyl	COP(=S)(OC)SCN1C(=O)C2=CC=CC=C2N=N1	1		1		0		0		0		0		1		0		0		0			1	0		1			0	12	4	2	1	5	4/12	1/2
196	Pesticides	Myclobutanil	CCCCC(CN1C=NC=N1)(C#N)C2=CC=C(C=C2)Cl	0		0		0		0		0		0		0		0		0		0			0	0		0			1	12	0	2	1	1	0/12	1/2
197	Pesticides	Fonofos	CCOP(=S)(CC)SC1=CC=CC=C1		1	0		0		0			0		1		0		0		0		0		0		0		0		0	3	0	11	2	2	0/3	2/11
198	Pesticides	Methidathion	COC1=NN(C(=O)S1)CSP(=S)(OC)OC	1		0		0		0		0		0		0		0		0		0			0	0		0			1	12	1	2	1	2	1/12	1/2
199	Pesticides	Pyridaben	CC(C)(C)C1=CC=C(C=C1)CSC2=C(C(=O)N(N=C2)C(C)(C)C)Cl	1		1		0		1		0		1		1		1		0		0			1	1		1			0	12	8	2	1	9	8/12	1/2
200	PFASs	Perfluoro-2-methyl-3-oxahexanoic acid	C(=O)(C(C(F)(F)F)(OC(C(C(F)(F)F)(F)F)(F)F)F)O	0			1		0		0	0		0		0		0		0		0		0			0	0		0		10	0	4	1	1	0/10	1/4
201	PFASs	Perfluoro-2,5-dimethyl-3,6-dioxanonanoic acid	C(=O)(C(C(F)(F)F)(OC(C(C(F)(F)F)(OC(C(C(F)(F)F)(F)F)(F)F)F)(F)F)F)O	0			1		0		0	0		0		0		0		0		0		0			0	0		0		10	0	4	1	1	0/10	1/4
202	PFASs	Perfluorooctanesulfonic acid	C(C(C(C(C(F)(F)S(=O)(=O)O)(F)F)(F)F)(F)F)(C(C(C(F)(F)F)(F)F)(F)F)(F)F	1		0		0		0		0		1		0		0		0		0		0		0		0		1		14	3	0	0	3	3/14	0/0
203	PFASs	Perfluoroundecanoic acid	C(=O)(C(C(C(C(C(C(C(C(C(C(F)(F)F)(F)F)(F)F)(F)F)(F)F)(F)F)(F)F)(F)F)(F)F)(F)F)O	1		1		0		0		0		1		0		0		0		1		0		0		0		1		14	5	0	0	5	5/14	0/0
204	PFASs	Perfluoropentanoic acid	C(=O)(C(C(C(C(F)(F)F)(F)F)(F)F)(F)F)O	0			1		0		0	0		0		0		0		0		0		0			0	0		0		10	0	4	1	1	0/10	1/4
205	PFASs	Perfluorohexanoic acid	C(=O)(C(C(C(C(C(F)(F)F)(F)F)(F)F)(F)F)(F)F)O	0		0		0		0		0		0		0		0		0		0		0		0		0		0		14	0	0	0	0	0/14	0/0
206	PFASs	Perfluorooctanoic acid	C(=O)(C(C(C(C(C(C(C(F)(F)F)(F)F)(F)F)(F)F)(F)F)(F)F)(F)F)O	1		1		0		0		0		0		0		1		0		0		0		0		0		0		14	3	0	0	3	3/14	0/0
207	PFASs	Perfluorodecanoic acid	C(=O)(C(C(C(C(C(C(C(C(C(F)(F)F)(F)F)(F)F)(F)F)(F)F)(F)F)(F)F)(F)F)(F)F)O	1		0		0		0		1		1		1		1		0		1		0		1		1		1		14	9	0	0	9	9/14	0/0
208	PFASs	Perfluorohexanesulfonic acid	C(C(C(C(F)(F)S(=O)(=O)O)(F)F)(F)F)(C(C(F)(F)F)(F)F)(F)F	1			1		0		1	0		0		0		0		0		0		0			0	0		0		10	1	4	2	3	1/10	2/4
209	PFASs	Perfluorobutanoic acid	C(=O)(C(C(C(F)(F)F)(F)F)(F)F)O	0			1		0		0	0		0		0		0		0		0		0			1	0		0		10	0	4	2	2	0/10	2/4
210	PFASs	Perfluorobutanesulfonic acid	C(C(C(F)(F)S(=O)(=O)O)(F)F)(C(F)(F)F)(F)F	0			0		0		0	0		0		0		0		0		0		0			0	0		0		10	0	4	0	0	0/10	0/4
211	PFASs	Perfluoroheptanoic acid	C(=O)(C(C(C(C(C(C(F)(F)F)(F)F)(F)F)(F)F)(F)F)(F)F)O	1		1		0		0		0		0		0		0		0		0		0		0		0		1		14	3	0	0	3	3/14	0/0
212	PFASs	Perfluorononanoic acid	C(=O)(C(C(C(C(C(C(C(C(F)(F)F)(F)F)(F)F)(F)F)(F)F)(F)F)(F)F)(F)F)O	1		1		0		0		0		0		1		0		0		0		0		1		0		1		14	5	0	0	5	5/14	0/0
213	Pharmaceuticals	Glybenclamide	COC1=C(C=C(C=C1)Cl)C(=O)NCCC2=CC=C(C=C2)S(=O)(=O)NC(=O)NC3CCCCC3		0	0		0		0			0		0		0		0		0		0		0		0		0		1	3	0	11	1	1	0/3	1/11
214	Pharmaceuticals	Acetaminophen	CC(=O)NC1=CC=C(C=C1)O	0		0		0		0		0		0		0		0		0		0			0	0		0			0	12	0	2	0	0	0/12	0/2
215	Pharmaceuticals	Primidone	CCC1(C(=O)NCNC1=O)C2=CC=CC=C2	0		0		0		0			0		0		0		0		0		0		0		0		0		0	4	0	10	0	0	0/4	0/10
216	Pharmaceuticals	Ibuprofen	CC(C)CC1=CC=C(C=C1)C(C)C(=O)O	0		0		0		0		0		0		0		1		0		0		0			0	0			0	12	1	2	0	1	1/12	0/2
217	Pharmaceuticals	Salbutamol	CC(C)(C)NCC(C1=CC(=C(C=C1)O)CO)O		1	0		0		0			1		1		0		0		0		1		0		0		0		1	3	0	11	5	5	0/3	5/11
218	Pharmaceuticals	Ketoprofen	CC(C1=CC(=CC=C1)C(=O)C2=CC=CC=C2)C(=O)O		0	0		0		0			0		0		0		0		0		0		0		0		0		0	3	0	11	0	0	0/3	0/11
219	Pharmaceuticals	Naproxen	C[C@@H](C1=CC2=C(C=C1)C=C(C=C2)OC)C(=O)O		1	0		0		0			0		0		0		0		0		0		0		0		0		1	3	0	11	2	2	0/3	2/11
220	Pharmaceuticals	Gemfibrozil	CC1=CC(=C(C=C1)C)OCCCC(C)(C)C(=O)O	0		0		0		0			0		0		0		0		0		0		0		0		0		0	4	0	10	0	0	0/4	0/10
221	Pharmaceuticals	Atenolol	CC(C)NCC(COC1=CC=C(C=C1)CC(=O)N)O	1		0		0		0			0		0		0		0		0		0		0		0		0		1	4	1	10	1	2	1/4	1/10
222	Pharmaceuticals	Carbamazepine	C1=CC=C2C(=C1)C=CC3=CC=CC=C3N2C(=O)N	0		0		0		0		0		0		0		0		0		0			0	0		0			0	12	0	2	0	0	0/12	0/2
223	Pharmaceuticals	Sotalol	CC(C)NCC(C1=CC=C(C=C1)NS(=O)(=O)C)O		0		0		0	0			0		1		0		0		0		1		0		0		0		0	1	0	13	2	2	0/1	2/13
224	Pharmaceuticals	Bezafibrate	CC(C)(C(=O)O)OC1=CC=C(C=C1)CCNC(=O)C2=CC=C(C=C2)Cl	0		0		0		0			1		0		1		1		0		0		0		1		1		1	4	0	10	6	6	0/4	6/10
225	Pharmaceuticals	Diazepam	CN1C(=O)CN=C(C2=C1C=CC(=C2)Cl)C3=CC=CC=C3		1	0		0		0			1		1		0		0		0		0		0		0		1		0	3	0	11	4	4	0/3	4/11
226	Pharmaceuticals	Metronidazole	CC1=NC=C(N1CCO)[N+](=O)[O-]	0		0		0		0			0		0		0		0		0		0		1		0		0		1	4	0	10	2	2	0/4	2/10
227	Pharmaceuticals	Aspirin	CC(=O)OC1=CC=CC=C1C(=O)O	1		0		0		0		0		0		0		0		0		0			0	0		0			0	12	1	2	0	1	1/12	0/2
228	Pharmaceuticals	Metoprolol	CC(C)NCC(COC1=CC=C(C=C1)CCOC)O	0			0	0			0		0		0		0		0		0		0		0		0		0		1	2	0	12	1	1	0/2	1/12
229	Pharmaceuticals	Fluoxetine	CNCCC(C1=CC=CC=C1)OC2=CC=C(C=C2)C(F)(F)F		0	0		1		0			0		0		0		0		0		0		0		0		0		1	3	1	11	1	2	1/3	1/11
230	Pharmaceuticals	Caffeine	CN1C=NC2=C1C(=O)N(C(=O)N2C)C	0		1		0		0		0		0		0		0		0		0			1	0		0			0	12	1	2	1	2	1/12	1/2
231	Pharmaceuticals	Diphenhydramine	CN(C)CCOC(C1=CC=CC=C1)C2=CC=CC=C2		0	0		0		0			1		0		0		0		0		0		0		0		0		0	3	0	11	1	1	0/3	1/11
232	Pharmaceuticals	Phenazone	CC1=CC(=O)N(N1C)C2=CC=CC=C2	0		0		0		0			0		0		0		0		0		0		0		0		0		0	4	0	10	0	0	0/4	0/10
233	Pharmaceuticals	Codeine	CN1CC[C@]23[C@@H]4[C@H]1CC5=C2C(=C(C=C5)OC)O[C@H]3[C@H](C=C4)O		1	1		0		0			0		0		0		0		0		0		0		0		0		0	3	1	11	1	2	1/3	1/11
234	Pharmaceuticals	Clofibric acid	CC(C)(C(=O)O)OC1=CC=C(C=C1)Cl	0		0		0		0			0		0		0		0		0		0		0		0		0		0	4	0	10	0	0	0/4	0/10
235	Pharmaceuticals	Propylparaben	CCCOC(=O)C1=CC=C(C=C1)O	1		0		0		1		0		0		0		0		0		0			0	0		0			1	12	2	2	1	3	2/12	1/2
236	Pharmaceuticals	Methylparaben	COC(=O)C1=CC=C(C=C1)O	0		0		0		0		0		0		0		0		0		0			0	0		0			1	12	0	2	1	1	0/12	1/2
237	Plasticizers (PAEs)	Di(2-ethylhexyl) phthalate	CCCCC(CC)COC(=O)C1=CC=CC=C1C(=O)OCC(CC)CCCC	0		0		0		0		0		0		0		0		0		0			0	0		0			1	12	0	2	1	1	0/12	1/2
238	Plasticizers (PAEs)	Di(2-methoxyethyl) phthalate	COCCOC(=O)C1=CC=CC=C1C(=O)OCCOC	0		0		0		0			0		0		0		0		0		0		0		0		1		0	4	0	10	1	1	0/4	1/10
239	Plasticizers (PAEs)	Bis(2-butoxyethyl) phthalate	CCCCOCCOC(=O)C1=CC=CC=C1C(=O)OCCOCCCC	1		0		0		0			0		1		0		0		0		0		1		0		1		0	4	1	10	3	4	1/4	3/10
240	Plasticizers (PAEs)	Di-n-octyl phthalate	CCCCCCCCOC(=O)C1=CC=CC=C1C(=O)OCCCCCCCC	0		0		0		0		0		0		1		0		0		0			1	0		0			0	12	1	2	1	2	1/12	1/2
241	Plasticizers (PAEs)	Dimethyl phthalate	COC(=O)C1=CC=CC=C1C(=O)OC	0		0		0		0		0		0		0		0		0		0			0	0		0			1	12	0	2	1	1	0/12	1/2
242	Plasticizers (PAEs)	Dicyclohexyl phthalate	C1CCC(CC1)OC(=O)C2=CC=CC=C2C(=O)OC3CCCCC3	1		1		0		1		1		1		1		1		0		1		1			0	1			0	12	10	2	0	10	10/12	0/2
243	Plasticizers (PAEs)	Diethyl phthalate	CCOC(=O)C1=CC=CC=C1C(=O)OCC	0		0		0		0		0		0		0		0		0		0			0	0		0			0	12	0	2	0	0	0/12	0/2
244	Plasticizers (PAEs)	Diisobutyl phthalate	CC(C)COC(=O)C1=CC=CC=C1C(=O)OCC(C)C	1		0		0		0		1		1		1		1		0		0			0	0		1			0	12	6	2	0	6	6/12	0/2
245	Plasticizers (PAEs)	Dibutyl 1,2-benzenedicarboxylate	CCCCOC(=O)C1=CC=CC=C1C(=O)OCCCC	1		0		0		0		0		1		0		0		0		0			1	0		1			0	12	3	2	1	4	3/12	1/2
246	Plasticizers (PAEs)	Benzyl butyl phthalate	CCCCOC(=O)C1=CC=CC=C1C(=O)OCC2=CC=CC=C2	1		0		0		0		0		1		1		0		0		0			0	0		0			0	12	3	2	0	3	3/12	0/2
247	Plasticizers (PAEs)	Dihexyl phthalate	CCCCCCOC(=O)C1=CC=CC=C1C(=O)OCCCCCC	1		0		0		0		0		0		1		1		0		0			1	0		1			0	12	4	2	1	5	4/12	1/2
248	PPCPs	Sulfamerazine	CC1=NC(=NC=C1)NS(=O)(=O)C2=CC=C(C=C2)N		0	0		0		0			0		0		0		0		0		0		0		0		0		1	3	0	11	1	1	0/3	1/11
249	PPCPs	Sulfamethizole	CC1=NN=C(S1)NS(=O)(=O)C2=CC=C(C=C2)N		0	0		0		0			0		0		0		0		0		0		0		0		0		1	3	0	11	1	1	0/3	1/11
250	PPCPs	Sulfapyridine	C1=CC=NC(=C1)NS(=O)(=O)C2=CC=C(C=C2)N		0	0		0		0			0		0		0		0		0		0		0		0		0		0	3	0	11	0	0	0/3	0/11
251	PPCPs	Oxolinic acid	CCN1C=C(C(=O)C2=CC3=C(C=C21)OCO3)C(=O)O		0	0		0		0			0		0		0		0		0		0		0		0		0		0	3	0	11	0	0	0/3	0/11
252	PPCPs	Diclofenac	C1=CC=C(C(=C1)CC(=O)O)NC2=C(C=CC=C2Cl)Cl		0		1		0		1		0		0		0		0		0		0		0		0		0		0	0	0	14	2	2	0/0	2/14
253	PPCPs	Thiamphenicol	CS(=O)(=O)C1=CC=C(C=C1)[C@H]([C@@H](CO)NC(=O)C(Cl)Cl)O		0	0		0		0			0		0		0		0		0		0		0		0		0		1	3	0	11	1	1	0/3	1/11
254	PPCPs	Sulpiride	CCN1CCCC1CNC(=O)C2=C(C=CC(=C2)S(=O)(=O)N)OC		0	0		0		0			0		0		0		0		0		0		0		1		0		1	3	0	11	2	2	0/3	2/11
255	PPCPs	Ifenprodil	CC(C(C1=CC=C(C=C1)O)O)N2CCC(CC2)CC3=CC=CC=C3		1	0		0		0			1		0		0		0		0		1		0		0		1		1	3	0	11	5	5	0/3	5/11
256	PPCPs	Sulfadoxine	COC1=C(N=CN=C1OC)NS(=O)(=O)C2=CC=C(C=C2)N		0	0		0		0			0		0		0		0		0		0		0		0		0		1	3	0	11	1	1	0/3	1/11
257	PPCPs	Cinoxacin	CCN1C2=CC3=C(C=C2C(=O)C(=N1)C(=O)O)OCO3		0	0		0		0			0		0		0		0		0		0		0		0		0		1	3	0	11	1	1	0/3	1/11
258	PPCPs	Pirenzepine	CN1CCN(CC1)CC(=O)N2C3=CC=CC=C3C(=O)NC4=C2N=CC=C4		0	0		0		0			0		0		0		0		0		0		0		0		0		1	3	0	11	1	1	0/3	1/11
259	PPCPs	Flumequine	CC1CCC2=C3N1C=C(C(=O)C3=CC(=C2)F)C(=O)O		0	0		0		0			0		0		0		0		0		0		0		0		0		1	3	0	11	1	1	0/3	1/11
260	PPCPs	Crotamiton	CCN(C1=CC=CC=C1C)C(=O)/C=C/C	0		0		0		0			0		0		0		0		0		0		0		0		0		1	4	0	10	1	1	0/4	1/10
261	PPCPs	Sulfaphenazole	C1=CC=C(C=C1)N2C(=CC=N2)NS(=O)(=O)C3=CC=C(C=C3)N		0	0		0		0			0		0		0		0		0		0		0		0		0		1	3	0	11	1	1	0/3	1/11
262	PPCPs	Indomethacin	CC1=C(C2=C(N1C(=O)C3=CC=C(C=C3)Cl)C=CC(=C2)OC)CC(=O)O	0		0		0		0		0		0		0		0		0		0			0	0		0			1	12	0	2	1	1	0/12	1/2
263	PPCPs	Theophylline	CN1C2=C(C(=O)N(C1=O)C)NC=N2	0		0		0		0		0		0		0		0		0		0			1	0		0			0	12	0	2	1	1	0/12	1/2
264	PPCPs	Sulfameter	COC1=CN=C(N=C1)NS(=O)(=O)C2=CC=C(C=C2)N		0	0		0		0			0		0		0		0		0		0		0		0		0		1	3	0	11	1	1	0/3	1/11
265	PPCPs	Salicylic acid	C1=CC=C(C(=C1)C(=O)O)O	0		0		0		0			0		0		0		0		0		0		0		0		0		0	4	0	10	0	0	0/4	0/10
266	PPCPs	Carbazochrome	CN1CC(C2=CC(=C(C=C21)O)N=NC(=O)N)O		0		0		0	0			1		0		1		1		0		0		0		0		1		0	1	0	13	4	4	0/1	4/13
267	PPCPs	Trimethoprim	COC1=CC(=CC(=C1OC)OC)CC2=CN=C(N=C2N)N		0	0		0		0			0		0		0		0		0		0		0		0		0		1	3	0	11	1	1	0/3	1/11
268	PPCPs	Sulfachloropyridazine	C1=CC(=CC=C1N)S(=O)(=O)NC2=NN=C(C=C2)Cl		0	0		0		0			0		0		0		0		0		0		0		0		0		0	3	0	11	0	0	0/3	0/11
269	PPCPs	Disopyramide	CC(C)N(CCC(C1=CC=CC=C1)(C2=CC=CC=N2)C(=O)N)C(C)C		0	0		0		0			0		0		0		0		0		0		0		0		0		0	3	0	11	0	0	0/3	0/11
270	PPCPs	Triclocarban	C1=CC(=CC=C1NC(=O)NC2=CC(=C(C=C2)Cl)Cl)Cl	1		0		0		1		1		1		1		1		0		0			0	1		1			0	12	8	2	0	8	8/12	0/2
271	PPCPs	Triclosan	C1=CC(=C(C=C1Cl)O)OC2=C(C=C(C=C2)Cl)Cl	1		0		1		1		1		1		1		1		1		1			0	0		1			1	12	10	2	1	11	10/12	1/2
272	UV-Filters	3,3,5-Trimethylcyclohexyl salicylate	CC1CC(CC(C1)(C)C)OC(=O)C2=CC=CC=C2O	0		0		0		0			1		1		1		1		0		1		0		0		0		0	4	0	10	5	5	0/4	5/10
273	UV-Filters	2-Ethylhexyl salicylate	CCCCC(CC)COC(=O)C1=CC=CC=C1O	0		0		0		0		1		1		1		1		0		0		0			0	0			1	12	4	2	1	5	4/12	1/2
274	UV-Filters	Benzophenone	C1=CC=C(C=C1)C(=O)C2=CC=CC=C2	0		0		0		0		0		0		0		0		0		0			0	0		0			0	12	0	2	0	0	0/12	0/2
275	UV-Filters	2,4-Dihydroxybenzophenone	C1=CC=C(C=C1)C(=O)C2=C(C=C(C=C2)O)O	1		0		0		1		0		0		0		0		0		0		0			0	0			0	12	2	2	0	2	2/12	0/2
276	UV-Filters	2-Hydroxy-4-methoxybenzophenone	COC1=CC(=C(C=C1)C(=O)C2=CC=CC=C2)O	1		0		0		0		1		0		0		0		0		0		0			0	0			1	12	2	2	1	3	2/12	1/2
277	UV-Filters	4-Aminobenzoic acid	C1=CC(=CC=C1C(=O)O)N	0		0		0		0		0		0		0		0		0		0			0	0		0			0	12	0	2	0	0	0/12	0/2
278	UV-Filters	2-Ethylhexyl 4-(dimethylamino)benzoate	CCCCC(CC)COC(=O)C1=CC=C(C=C1)N(C)C	1		0		0		1			0		0		0		0		0		0		0		0		0		1	4	2	10	1	3	2/4	1/10
279	UV-Filters	Octinoxate	CCCCC(CC)COC(=O)/C=C/C1=CC=C(C=C1)OC		1	0		0		0		1		0		0		1		0		0			0		0	1		0		11	3	3	1	4	3/11	1/3
280	UV-Filters	2-Ethylhexyl-2-cyano-3,3-diphenylacrylate	CCCCC(CC)COC(=O)C(=C(C1=CC=CC=C1)C2=CC=CC=C2)C#N		1	1		0		1			1		1		0		0		0		0		0		1		0		1	3	2	11	5	7	2/3	5/11
281	UV-Filters	Benzocaine	CCOC(=O)C1=CC=C(C=C1)N	0		0		0		0			0		0		0		0		0		0		0		0		0		0	4	0	10	0	0	0/4	0/10
282	EDCs (Endocrine Disrupting Chemicals)	Epiandrosterone	C[C@]12CC[C@@H](C[C@@H]1CC[C@@H]3[C@@H]2CC[C@]4([C@H]3CCC4=O)C)O		0		0		0		0		0		0		0		0		0		0		0		0		0		0	0	0	14	0	0	0/0	0/14
283	Pesticides	Fenobucarb	CCC(C)C1=CC=CC=C1OC(=O)NC		1		0		0		0		0		0		0		0		0		0		0		0		0		1	0	0	14	2	2	0/0	2/14
284	Pesticides	Carbofuran-3-hydroxy	CC1(C(C2=C(O1)C(=CC=C2)OC(=O)NC)O)C		0		1		0		0		0		0		0		0		0		0		0		0		0		0	0	0	14	1	1	0/0	1/14
285	Pesticides	Cadusafos	CCC(C)SP(=O)(OCC)SC(C)CC		0		0		0		0		0		0		0		0		0		0		0		0		0		0	0	0	14	0	0	0/0	0/14
286	Pesticides	Phorate sulfoxide	CCOP(=S)(OCC)SCS(=O)CC		0		0		0		0		0		0		0		0		0		0		0		0		1		1	0	0	14	2	2	0/0	2/14
287	Pesticides	Isoprothiolane	CC(C)OC(=O)C(=C1SCCS1)C(=O)OC(C)C		1		0		0		1		0		0		0		0		0		0		0		0		0		0	0	0	14	2	2	0/0	2/14
288	Pesticides	Fenthion-sulfoxide	CC1=C(C=CC(=C1)OP(=S)(OC)OC)S(=O)C		1		0		0		1		0		0		0		0		0		0		0		0		0		1	0	0	14	3	3	0/0	3/14
289	Pesticides	Chlorbenzuron	C1=CC=C(C(=C1)C(=O)NC(=O)NC2=CC=C(C=C2)Cl)Cl		0		0		0		0		0		0		0		0		0		0		1		0		1		0	0	0	14	2	2	0/0	2/14
290	Pesticides	Fenthion-sulfone	CC1=C(C=CC(=C1)OP(=S)(OC)OC)S(=O)(=O)C		1		0		0		1		0		0		0		0		0		0		0		0		0		1	0	0	14	3	3	0/0	3/14
291	Pesticides	Fipronil sulfone	C1=C(C=C(C(=C1Cl)N2C(=C(C(=N2)C#N)S(=O)(=O)C(F)(F)F)N)Cl)C(F)(F)F		0		0		0		0		1		0		1		1		0		0		0		1		1		0	0	0	14	5	5	0/0	5/14
292	Pesticides	Isofenphos-methyl	CC(C)NP(=S)(OC)OC1=CC=CC=C1C(=O)OC(C)C		1		0		0		0		0		0		0		0		0		0		1		0		0		0	0	0	14	2	2	0/0	2/14
293	Pesticides	Fenvalerate	CC(C)C(C1=CC=C(C=C1)Cl)C(=O)OC(C#N)C2=CC(=CC=C2)OC3=CC=CC=C3		0		0		0		1		0		0		0		0		0		0		0		0		1		0	0	0	14	2	2	0/0	2/14
294	PFASs	henicosafluorodecanesulphonic acid	C(C(C(C(C(C(F)(F)S(=O)(=O)O)(F)F)(F)F)(F)F)(F)F)(C(C(C(C(F)(F)F)(F)F)(F)F)(F)F)(F)F		1		1		0		1		0		1		0		0		0		0		0		0		0		1	0	0	14	5	5	0/0	5/14
295	PFASs	Perfluorododecanoic acid	C(=O)(C(C(C(C(C(C(C(C(C(C(C(F)(F)F)(F)F)(F)F)(F)F)(F)F)(F)F)(F)F)(F)F)(F)F)(F)F)(F)F)O		1		1		0		0		0		1		1		1		0		1		0		1		0		1	0	0	14	8	8	0/0	8/14
296	Plasticizers (PAEs)	Bis(2-ethoxyethyl) phthalate	CCOCCOC(=O)C1=CC=CC=C1C(=O)OCCOCC		0		0		0		0		0		0		0		0		0		0		0		0		0		0	0	0	14	0	0	0/0	0/14
297	PPCPs	Sulfadimethoxypyrimidine	COC1=CC(=NC(=N1)NS(=O)(=O)C2=CC=C(C=C2)N)OC		0		0		0		0		0		0		0		0		0		0		0		0		0		0	0	0	14	0	0	0/0	0/14
298	PPCPs	Lomefloxacin	CCN1C=C(C(=O)C2=CC(=C(C(=C21)F)N3CCNC(C3)C)F)C(=O)O		0		0		0		0		0		0		0		0		0		0		0		0		0		0	0	0	14	0	0	0/0	0/14
299	PPCPs	Penicillin G	CC1([C@@H](N2[C@H](S1)[C@@H](C2=O)NC(=O)CC3=CC=CC=C3)C(=O)O)C		0		0		0		0		0		0		0		0		0		0		0		1		0		0	0	0	14	1	1	0/0	1/14
300	PPCPs	Penicillin V	CC1([C@@H](N2[C@H](S1)[C@@H](C2=O)NC(=O)COC3=CC=CC=C3)C(=O)O)C		0		1		0		0		1		0		0		0		0		0		0		0		0		0	0	0	14	2	2	0/0	2/14
301	PPCPs	Oxacillin	CC1=C(C(=NO1)C2=CC=CC=C2)C(=O)N[C@H]3[C@@H]4N(C3=O)[C@H](C(S4)(C)C)C(=O)O		0		0		0		0		0		0		0		0		0		0		0		0		0		1	0	0	14	1	1	0/0	1/14
302	PPCPs	Nafcillin	CCOC1=C(C2=CC=CC=C2C=C1)C(=O)N[C@H]3[C@@H]4N(C3=O)[C@H](C(S4)(C)C)C(=O)O		1		1		0		0		1		1		0		0		0		0		1		0		1		0	0	0	14	6	6	0/0	6/14
303	PPCPs	Cloxacillin	CC1=C(C(=NO1)C2=CC=CC=C2Cl)C(=O)N[C@H]3[C@@H]4N(C3=O)[C@H](C(S4)(C)C)C(=O)O		1		0		0		0		0		0		0		0		0		0		1		0		1		1	0	0	14	4	4	0/0	4/14
304	PPCPs	Lincomycin	CCC[C@@H]1C[C@H](N(C1)C)C(=O)N[C@@H]([C@@H]2[C@@H]([C@@H]([C@H]([C@H](O2)SC)O)O)O)[C@@H](C)O		0		0		0		0		0		0		0		0		0		0		0		0		0		1	0	0	14	1	1	0/0	1/14
305	PPCPs	2-hydroxyquinoxaline	C1=CC=C2C(=C1)NC(=O)C=N2		0		0		0		0		0		0		0		0		0		0		0		0		0		0	0	0	14	0	0	0/0	0/14
306	PPCPs	Difloxacin	CN1CCN(CC1)C2=C(C=C3C(=C2)N(C=C(C3=O)C(=O)O)C4=CC=C(C=C4)F)F		1		0		0		1		0		0		0		0		0		0		1		0		0		0	0	0	14	3	3	0/0	3/14
307	PPCPs	Miconazole Nitrate	C1=CC(=C(C=C1Cl)Cl)COC(CN2C=CN=C2)C3=C(C=C(C=C3)Cl)Cl		1		1		0		0		1		1		1		0		0		1		0		1		1		1	0	0	14	9	9	0/0	9/14
308	PPCPs	Doxycycline	C[C@@H]1[C@H]2[C@@H]([C@H]3[C@@H](C(=O)C(=C([C@]3(C(=O)C2=C(C4=C1C=CC=C4O)O)O)O)C(=O)N)N(C)C)O		0		0		0		0		0		1		0		0		0		0		0		0		0		1	0	0	14	2	2	0/0	2/14
309	PPCPs	Chlortetracycline	C[C@@]1([C@H]2C[C@H]3[C@@H](C(=O)C(=C([C@]3(C(=O)C2=C(C4=C(C=CC(=C41)Cl)O)O)O)O)C(=O)N)N(C)C)O		1		0		0		1		0		1		0		0		0		0		0		0		0		1	0	0	14	4	4	0/0	4/14
310	PPCPs	Propranolol	CC(C)NCC(COC1=CC=CC2=CC=CC=C21)O		1		0		0		0		0		1		0		0		0		0		0		0		0		1	0	0	14	3	3	0/0	3/14
311	PPCPs	Norfluoxetine	C1=CC=C(C=C1)C(CCN)OC2=CC=C(C=C2)C(F)(F)F		0		0		1		0		0		0		0		0		0		0		0		0		0		1	0	0	14	2	2	0/0	2/14
312	PPCPs	Sertraline	CN[C@H]1CC[C@H](C2=CC=CC=C12)C3=CC(=C(C=C3)Cl)Cl		0		0		1		1		1		1		1		1		1		0		0		0		0		0	0	0	14	7	7	0/0	7/14
			Number of active chemicals	106	33	68	15	11	2	71	11	43	22	45	27	55	14	42	9	17	6	22	10	5	59	27	15	65	28	5	141
			Number of inactive chemicals	115	58	192	37	257	42	194	36	139	108	137	103	127	116	140	121	165	124	160	120	33	215	123	147	117	102	10	156
			Total number	221	91	260	52	268	44	265	47	182	130	182	130	182	130	182	130	182	130	182	130	38	274	150	162	182	130	15	297
